# Supplementary material
Source: ML conference proceedings conference paper supplement (https://openaccess.thecvf.com/content/CVPR2026/html/Yadav_VideoNet_A_Large-Scale_CVPR_2026_paper.html)
Supplement: Supplementary file 1 [file Yadav_VideoNet_A_Large-Scale_CVPR_2026_supplemental.pdf]

# VideoNet: A Large-Scale Dataset for Domain-Specific Action Recognition

## Supplementary Material

This Appendix contains the following sections:

- § **A - Benchmark statistics**; discusses VideoNet’s inter-domain breadth and intra-domain depth, the latter in comparison to existing works.
- § **B - Benchmark collection**; prints LLM prompts and UIs used during benchmark construction.
- § **C - Model evaluation**; details on how we evaluated existing models on the VideoNet benchmark (prompts, video sampling, model versions, etc.).
- § **D - Zero-shot ablations**; detailed results for the ablations shown in Figure 4.
- § **E - Few-shot results**; detailed results for models in the few-shot setting. Additional results for 72B models, CLIP models, and optical flow models. Discussion of prompt-sensitivity in Gemini and the impact of few-shot examples on yes/no bias.
- § **F - Benchmark qualitative analysis**; examination of the types of failures VLMs suffer on the domain-specific action recognition task.
- § **G - Human evaluation**; details on the human evaluation setup. In-depth human evaluation results.
- § **H - Additional training details**; construction of VQA pairs from labeled video clips. Listing of learning rates, image pooling, etc.
- § **I - Data filtering strategies**; description of and motivation behind filtering strategies. Analysis of differences in downstream performance on VideoNet benchmark when different filters are applied.

Table 6. **Depth of VideoNet.** The last two columns report, for a given domain, the # of actions in other benchmarks and the # of actions in VideoNet respectively. When compared to domain-specific benchmarks that focus on fewer domains, it is clear that VideoNet maintains sufficient depth in the domains it covers. (Many values in the second-to-last column sourced from Table 1 in [58].)

| Domain         | Paper Name             | Paper Venue    | Theirs | Ours |
|----------------|------------------------|----------------|--------|------|
| Figure Skating | MCFS [34]              | AAAI 2021      | 130    |      |
|                | MMFS [35]              | arXiv          | 46     |      |
|                | FSBench [19]           | CVPR 2025      | 20     | 40   |
|                | Fis-V [56]             | TCSVT 2020     | 13     |      |
|                | FSD-10 [33]            | Neurocomputing | 10     |      |
| Basketball     | FineSports [58]        | CVPR 2024      | 52     |      |
|                | Basket [42]            | CVPR 2025      | 20     | 46   |
|                | <i>Basketball</i> [23] | ICASSP 2020    | 27     |      |
|                | MultiSports [32]       | ICCV 2021      | 18     |      |
| Soccer         | MultiSports [32]       | ICCV 2021      | 21     | 43   |
|                | SoccerNet [20]         | CVPR 2018      | 3      |      |

## A. Benchmark Statistics

Given that previous domain-specific benchmarks (*e.g.* [23, 35, 48, 57, 58], see Section 2) have chosen to sacrifice breadth for depth, it is natural to ask whether VideoNet inevitably sacrifices depth for breadth. As shown in Table 6, VideoNet achieves greater depth in many of the domains it covers when compared to previous one-domain works.

For the VideoNet benchmark, we release 7,036 clips spanning 38 domains within 7 categories. Table 7 provides a breakdown of each domain’s category, number of actions, number of clips, and the length of these clips.

Basic benchmark-wide statistics on video duration are provided in Table 1; in particular, the average clip is 12.8 seconds long and the typical clip is 5.0 seconds long. Here we emphasize the long-tail nature of video lengths in VideoNet. This is caused by a handful of domains having much lengthier clips than most. For instance, the median length of a knots clip and a suturing clip are 36 seconds and 32.5 seconds respectively (see Table 7). Concretely, the kurtosis of video durations in VideoNet is 40.26, indicating a heavy tail.<sup>4</sup> The long tail is made evident by Figure 6.

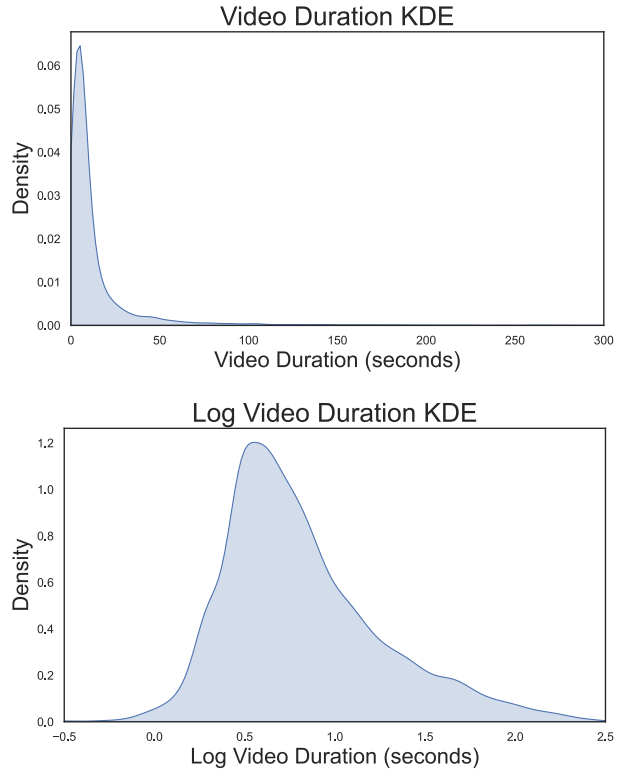

Figure 6. **Kernel Density Estimation for VideoNet Clip Durations.** The top graph clearly shows a long tail, but it is difficult to analyze due to the right tail’s sheer length and the concentration of near-0 durations. For closer inspection, the bottom graph uses log duration. The smoothing bandwidth is determined by Scott’s Rule.

<sup>4</sup>We report the Pearson kurtosis, not the Fisher/excess kurtosis. For reference, the Pearson kurtosis of the normal distribution is 3.

Table 7. **Actions & Clips per Domain.** We report the number of actions and number of clips in our benchmark for each domain below. Also reported are clip length statistics in seconds. While our evaluation setup only requires 5 clips for each action, we release between 5 and 7 clips for each action for future works to build on. Entries ordered alphabetically, left-to-right.

| Category Name      | Domain Name                | # Actions | # Clips | Clip Duration (s) |        |
|--------------------|----------------------------|-----------|---------|-------------------|--------|
|                    |                            |           |         | Mean              | Median |
| Beauty & Self Care | Hairstyling                | 14        | 91      | 12.34             | 4.7    |
|                    | Spa Massage                | 11        | 72      | 21.40             | 11.0   |
|                    | Tattooing                  | 6         | 39      | 7.98              | 4.8    |
| Crafts & Art       | Calligraphy                | 8         | 53      | 5.86              | 4.6    |
|                    | Crochet                    | 38        | 252     | 40.23             | 22.0   |
|                    | Hand Sewing / Embroidery   | 41        | 265     | 41.47             | 25.0   |
|                    | Knots                      | 55        | 379     | 44.56             | 36.0   |
|                    | Painting                   | 8         | 49      | 25.71             | 11.0   |
|                    | Pottery                    | 10        | 67      | 25.84             | 12.0   |
|                    | Woodworking / Whittling    | 4         | 25      | 7.57              | 5.0    |
| Dance              | Ballet                     | 39        | 248     | 5.28              | 4.0    |
|                    | Bharatanatyam              | 24        | 161     | 13.95             | 9.0    |
|                    | Break Dance                | 34        | 220     | 6.63              | 5.0    |
|                    | Salsa                      | 21        | 143     | 7.26              | 6.0    |
|                    | Tap Dance                  | 29        | 186     | 6.69              | 4.0    |
| Food & Beverage    | Bartending                 | 30        | 197     | 9.50              | 5.0    |
|                    | Coffee                     | 16        | 100     | 12.98             | 9.0    |
|                    | Cooking                    | 51        | 331     | 17.89             | 10.0   |
| Hobbies            | Bouldering                 | 23        | 146     | 7.58              | 6.0    |
|                    | Gardening                  | 20        | 121     | 21.24             | 10.7   |
|                    | Gym                        | 22        | 145     | 5.28              | 4.0    |
|                    | Juggling                   | 26        | 176     | 6.52              | 4.0    |
|                    | Parkour                    | 40        | 261     | 4.69              | 3.4    |
|                    | Pen Spinning               | 33        | 220     | 4.04              | 3.0    |
|                    | Skateboarding              | 49        | 324     | 4.70              | 4.0    |
| Medical            | Yo-yo                      | 55        | 361     | 8.10              | 6.0    |
|                    | Neurological Abnormalities | 21        | 136     | 12.02             | 7.6    |
|                    | Neurological Assessments   | 15        | 101     | 9.15              | 7.0    |
| Sports             | Suturing                   | 14        | 94      | 48.00             | 32.5   |
|                    | American Football          | 54        | 336     | 5.79              | 5.0    |
|                    | Basketball                 | 46        | 284     | 4.01              | 4.0    |
|                    | Cheerleading               | 23        | 155     | 5.71              | 4.4    |
|                    | Cricket                    | 46        | 288     | 3.95              | 3.1    |
|                    | Fencing                    | 20        | 123     | 4.99              | 3.0    |
|                    | Figure Skating             | 40        | 258     | 6.33              | 5.0    |
|                    | Ice Hockey                 | 39        | 244     | 4.35              | 4.0    |
|                    | Soccer                     | 43        | 268     | 3.95              | 3.3    |
|                    | Tennis                     | 19        | 117     | 4.40              | 3.0    |
| <i>All</i>         | <i>All</i>                 | 1,087     | 7,037   | 12.80             | 5.0    |

## B. Benchmark Collection

### B.1. LLM Augmentation of Action Lists

After collecting initial action lists from expert online sources, we expand them with Claude as specified in Figure 7.

### B.2. LLM Deduplication of Action Lists

We then de-duplicate the action lists. Note that the LLM’s response is only taken as a suggestion – the authors manually review duplicate actions identified by the LLM to decide if they are true duplicates or not. To preserve the integrity of our negatives and improve the fine-grained nature of our benchmark, if the action list has a general action (e.g., dunk) and many varieties of that action (e.g., tomahwak dunk, windmill dunk, alley-oop dunk), we remove the former and keep the latter. Refer to Figure 8 for the prompt.

### B.3. LLM Generation of Action Definitions with Web-Search

We walk through our action definition generation pipeline as discussed earlier in § 3.1.

Initially, our pilot annotation study revealed that annotators had trouble correctly identifying actions when provided only with action labels, mainly due to their lack of domain-specific knowledge; based on their feedback, they struggled to ground the performed action in video and distinguish the accurate actions from incorrect ones. This initial setup resulted in numerous inaccurately labeled video clips.

To address this knowledge gap, we provide explicit action definitions describing the visual characteristics of each action using layman’s terms. We design these definitions to be a stand-alone resource, thereby removing the need for annotators to locate external references. We use an LLM, Claude-3.7, with web-search capabilities to generate accurate action definitions informed by expert online communities. For each domain, we provide all actions at once and ensure the definitions satisfy the following conditions: they avoid overlap and do not reference other actions’ definitions; they clearly elaborate on basic, atomic actions to minimize jargon, particularly for actions involving combinations of simpler actions; and they mention key differences from similar actions in the same list to prevent confusion.

We observe that providing action definitions during the annotation stage significantly helps non-expert humans in understanding the action. These improvements are further supported by the human evaluation results presented in Figure 5. We provide our exact prompt in Figure 9.

### B.4. LLM Generated Hard Negatives

Figures 10-14 present the prompts and LLM generation parameters used to create the hard negatives described in § 3.3. In the first stage, we use gpt-4.5-preview to create an initial balanced set of hard negative candidates (Figure 11).

In later stages, we use o3-2025-04-16 to iteratively refine the negatives by 1) correcting false negatives that may co-occur with the positive actions, 2) diversifying the selection patterns by incorporating negatives with varying types of visual similarity, and 3) ensuring each action appears as a hard negative with balanced frequency (Figures 12-14).

### B.5. Human Annotator UIs

Figures 15, 16, and 17 contain the user interfaces shown to human annotators during the collection, verification, and trimming stages respectively. For full reproducibility, the HTML/CSS will be made available on our GitHub repository. Annotators were paid \$15-\$17 per hour for their efforts.

### B.6. Sourcing Human Annotators

We begin with two pools of approximately 1000 and 50 human annotators. The annotators in these pools have done “good” and “exemplary” jobs, respectively, in previous Prolific studies hosted by the authors.<sup>5</sup>

(It may be helpful to review the annotation stages shown in Figure 3.) All annotators from the first pool are invited to complete Stage 1 (clip collection) on a small subset of domains (we later re-collected the data for this subset after we had filtered a set of “great” annotators). We then asked the second pool, in whom we had high confidence, to complete Stage 2 (clip verification). We kept the top one-fifth of annotators, as determined by the percentage of “yes” votes the clips they collected in Stage 1 received during the verification process in Stage 2. This newly-derived pool of approximately 200 annotators was used to collect clips for the VideoNet benchmark.

---

<sup>5</sup>Prolific is a crowd-sourcing platform.

I have the following list of <DOMAIN> actions:

<INITIAL ACTION LIST>

Provide me with suggestions of <DOMAIN> actions that are well-defined and highly-discernible. Your suggestions should not overlap with each other, nor should they overlap with any of the <DOMAIN> actions on the list I provided.

Figure 7. **Action list augmentation prompt.**

Are there any duplicates or near-duplicates in this list of <DOMAIN> actions?

Figure 8. **Action deduplication prompt.**

Generate detailed definitions for the following <DOMAIN> actions from <CATEGORY> category. Each definition should:

Be completely self-contained and understandable without referencing other actions. Explain any specialized terminology within the definition (using phrases like

"which is..." or "meaning...")

Include visual identification cues (what to look for to recognize the action)

Describe how this action differs from similar actions when applicable.

Be written for a general audience with no prior knowledge of the domain.

Format each definition as:

[ACTION NAME]: [Complete definition with all elements above]

Use web search to gather accurate information about these actions, but DO NOT include source links or citations in your final output. The goal is to create clean, comprehensive definitions that can be easily copied into a spreadsheet or database.

Here are the actions to define:

<ACTION LIST>

Remember that each definition must stand alone since readers may only see one definition at a time.

Figure 9. **Action definition prompt.**

## **System Prompt**

You are creating challenging "hard negative" options for multimodal action classification datasets across various domains (sports, arts, crafts, cooking, etc.).

Each action requires 3 hard negative options that are genuinely difficult for a machine learning model to distinguish from the positive action.

A truly "hard" negative:

- Shares visual/motion similarities with the positive action that would be difficult to distinguish in brief clips
- Is fundamentally different in purpose or technique despite visual similarities
- Cannot reasonably co-occur with the positive action in the same short video
- Avoids obvious selection patterns that would make classification too easy

Note:

Negatives should only come from the action list provided (not definitions or other sources)

- Check that EXACT positive and negative action names are used in the actions list when generating csv.

**Figure 10. System prompt for hard negative generation**

## **User Prompt**

Below is my list of "<ACTION>" actions, along with their definitions:  
<ACTION DEFINITION>

===

Your task is to create genuinely challenging "hard negative" options for each action that would confuse a computer vision model. Format your output as a clean CSV:

```
action,negative_1,negative_2,negative_3
(action_1),(hard negative_1),(hard negative_2),(hard negative_3)
```

...

CRITICAL REQUIREMENTS FOR TRULY HARD NEGATIVES:

1. MAXIMIZE VISUAL CONFUSION WITHOUT OBVIOUS PATTERNS:
  - Select actions that share visual features, body positions, or motion qualities with the positive action
  - Avoid predictable selection patterns (e.g., don't always choose the "next level up/down" or "same family" actions)
  - Mix selection criteria unpredictably to prevent the model from learning simple heuristics
2. STRATEGIC AMBIGUITY:
  - Include some negatives that differ in subtle ways (small variations in technique/position)
  - Include some negatives that differ in more significant ways but still maintain visual similarity
  - Vary the type of similarity (sometimes motion-based, sometimes position-based, sometimes tool/environment-based)
3. AVOID FUNCTIONALLY RELATED ACTIONS FOR NEGATIVES:
  - Never select actions that typically occur together with the positive action
  - Avoid actions that are commonly performed in sequence or as part of the same technique
  - Don't pair actions that would naturally appear in the same short video clip
  - Don't pair action categories that are too similar or the same as the positive action
4. REASONABLE DISTRIBUTION:
  - Each action should appear as a negative approximately 2-5 times across the dataset
  - Avoid extreme over-representation or under-representation
  - The overall pattern of selections should appear random and unpredictable

Please provide your hard negative choices for these actions in the same order as provided:

<ACTION LIST>

Negatives should only EXACTLY come from the action list provided (not definitions or made-up sources)

- Check that EXACT positive and negative action names are used in the actions list when generating csv.

## **API Details**

```
model: gpt-4.5-preview-2025-02-27
temperature: 0.5
max_tokens: 4096
```

Figure 11. First user prompt for hard-negative generation (1/4)

## User Prompt

Please provide your analysis of negative selections for their effectiveness as genuinely "hard" negatives:

First, check for selection patterns that could make classification too easy:

- Are there predictable patterns in how negatives were selected?
- Is there too much consistency in how negatives relate to positives?
- Would these patterns potentially provide shortcuts for a classification model?

Second, examine the visual confusion potential:

- How visually similar are the negatives to their positive actions?
- Is there sufficient variety in the types of visual similarity?
- Are the differences appropriately subtle to create genuine challenges?

Third, check for functional relationships:

- Are there any positive-negative pairs that typically occur together?
- Are there pairs that represent sequential or component actions?
- Would any pairs likely appear together in a short video clip?

Finally, review the overall distribution:

- Is any action severely over-represented or under-represented as a negative?
- Does the selection appear sufficiently unpredictable and varied?
- Are there imbalances that should be addressed?

For any issues identified, suggest specific improvements to create more genuinely challenging hard negatives.

Provide a summary of the analysis and suggestions for improvement.

## API Details

model: o3-2025-04-16  
reasoning effort: high

Figure 12. **Second user prompt for hard-negative generation (2/4)**

### User Prompt

Based on the analysis, provide a revised CSV with improved hard negatives.

Focus on fixing:

1. The most problematic selection patterns identified
2. Any actions with co-occurring negatives
3. Distribution imbalances

Briefly explain the changes made to each action's negatives, ensuring that the new selections are genuinely challenging and visually confusing.

Then, provide the revised CSV with fixed negative selections, without detailed explanations for each change.

### API Details

model: o3-2025-04-16  
reasoning effort: high

Figure 13. Third user prompt for hard-negative generation (3/4)

### User Prompt

Based on the comprehensive analysis and specific suggestions, synthesize a final CSV with truly challenging hard negatives for each action.

Incorporate all the suggested improvements while ensuring:

1. The final list follows the exact same order as the original action list
2. Each action has 3 negatives that create genuine visual confusion
3. The selection patterns remain unpredictable and varied
4. No functionally related actions are paired
5. The distribution is reasonably balanced  
(each action appears 2-5 times as a negative)

Provide the final clean CSV with optimized hard negatives:

### API Details

model: gpt-4.5-preview-2025-02-27  
temperature: 0.5  
max\_tokens: 4096

Figure 14. Final user prompt for hard-negative generation (4/4)

## Welcome!

We are a team of researchers **evaluating** the ability of AI models to **recognize actions** in videos.

To this end, we are collecting **short clips** that contain **figure skating actions**.

---

You are provided with the name of a figure skating action.

Your job is to go on YouTube and find **7 videos** that include the specified action.

For each video, you must identify a **segment** of the video **where the action occurs**.

You will be asked to report the **start and end times** (in seconds) of each segment.

Ensure that each segment includes only **one instance** of the action.

Ensure that there is **NOT** large text containing the action name on the screen during your chosen segment. (Scoreboards, TV channel logos, small text that doesn't include the action name, etc. are all OK.)

No more than 3 of the 7 YouTube videos you find may be from YouTube Shorts.

Please include segments from the beginning, middle, and end of videos. Do NOT only include segments from the very start or very end of videos.

You may enter the segment start/end times as **seconds** or **timestamps**. For example, if the segment starts 2 minutes and 12 seconds into the video, you could enter it as "132" or "2:12". **If you do the latter, please remember the colon.**

**If this is your first time completing this survey, please [watch this tutorial](#).**

---

**Domain Name: Figure Skating**

**Action Name: Biellmann Spin**

---

For your convenience, a definition of the action is provided below.

**Biellmann Spin:** A spin where the skater grabs their free blade and pulls the heel of their boot behind and above the level of the head, creating a split position with the head and back arched upward. Look for the distinctive "teardrop" shape formed by the skater's body.

---

| YouTube URL          | Start Time<br><small>(MM:SS or seconds)</small> | End Time<br><small>(MM:SS or seconds)</small> |
|----------------------|-------------------------------------------------|-----------------------------------------------|
| <input type="text"/> | <input type="text"/>                            | <input type="text"/>                          |
| <input type="text"/> | <input type="text"/>                            | <input type="text"/>                          |
| <input type="text"/> | <input type="text"/>                            | <input type="text"/>                          |
| <input type="text"/> | <input type="text"/>                            | <input type="text"/>                          |
| <input type="text"/> | <input type="text"/>                            | <input type="text"/>                          |
| <input type="text"/> | <input type="text"/>                            | <input type="text"/>                          |
| <input type="text"/> | <input type="text"/>                            | <input type="text"/>                          |
| <input type="text"/> | <input type="text"/>                            | <input type="text"/>                          |

Once you are done, please double check your segments before pressing the blue button below.

Figure 15. **Benchmark Clip Collection UI.** All of our UIs were refined based on annotator feedback. The annotators found this interface to be easy-to-use and appreciated the video tutorial. (Since the video tutorial was filmed by one of the authors, it will be linked in the final version of the paper once the double-blind process is over.)

# Welcome!

You will be provided with 7 clips of **Figure Skating**.

Each clip is *supposed* to include a **Biellmann Spin**, which is an **action in Figure Skating**.

We are almost 100% sure that a **majority** of the clips below include a Biellmann Spin. However, a **handful** of the clips may not include this action. Your job is to watch the clips closely and identify which clips do **NOT** include the desired action. Please be advised that we do not expect you to extensively research the action on your own (that would be quite time consuming). Instead, since most of the clips are of the desired action, we expect you to use your pattern recognition skills to recognize the outliers.

If the clip contains the desired action and is well trimmed, select "**yes, and well-trimmed**".

If the clip contains the desired action but is poorly trimmed, select "**yes, but poorly-trimmed**".

If the clip does not contain the desired action, select "**no**".

Please use your best judgement when determining if a clip is "poorly trimmed". In particular, the following scenarios are considered "poorly trimmed":

- the clip does not contain the entirety of the desired action
- the clip contains Figure Skating actions other than the desired action
- the clip has a noticeable delay between the beginning of the clip and when the action starts
- the clip has a noticeable delay between when the action finishes and the ending of the clip
- the clip contains text on-screen that identifies the action

If you are unsure about if a clip contains the desired action, feel free to search Google or YouTube for more information about a Biellmann Spin.

If this is your first time completing this survey, please [watch this tutorial](#).

For your convenience, a definition of the action follows.

**Biellmann Spin:** A spin where the skater grabs their free blade and pulls the heel of their boot behind and above the level of the head, creating a split position with the head and back arched upward. Look for the distinctive "teardrop" shape formed by the skater's body.

| Clip                                                                                | Does the clip contain the desired action?                                                                                                          |
|-------------------------------------------------------------------------------------|----------------------------------------------------------------------------------------------------------------------------------------------------|
|  | <p><input checked="" type="radio"/> Yes, and well-trimmed</p> <p><input type="radio"/> Yes, but poorly-trimmed</p> <p><input type="radio"/> No</p> |
|  | <p><input checked="" type="radio"/> Yes, and well-trimmed</p> <p><input type="radio"/> Yes, but poorly-trimmed</p> <p><input type="radio"/> No</p> |

Figure 16. **Benchmark Clip Verification UI.** For brevity, only two of seven clips are displayed in the screenshot above. Likewise, a green submit button follows these clips, but is omitted above.

# Welcome!

You are provided with 7 clips of Figure Skating.

Each clip includes a **Biellmann Spin**, which is an **action** in **Figure Skating**.

You will help us ensure that these clips are well-trimmed.

---

Clips are either "well-trimmed" or "poorly-trimmed".

We say that a clip is well-trimmed if the clip contains the entirety of the action and not much else.

On the other hand, a clip is poorly-trimmed if **at least one** of the following conditions are met:

- it does not contain the entirety of the action,
- it contains Figure Skating actions other than the desired action,
- there is a noticeable delay between the beginning of the clip and when the action starts,
- there is a noticeable delay between when the action finishes and the ending of the clip.

---

Of the 7 total clips, another Prolific annotator determined that 5 of them were well-trimmed, while the remaining 2 clips were poorly-trimmed.

Your job is two-fold: first, you will watch the 5 well-trimmed clips to get a sense of what a Biellmann Spin in Figure Skating looks like; then, you will watch the 2 poorly-trimmed clips and adjust their trimmings so that they become well-trimmed.

Lastly, we want to ensure that none of the clips contain any text on-screen that writes out "Biellmann Spin". If such text is in the original poorly-trimmed clip, please try to trim it out. If your updated trimming still includes the text, please indicate so using the provided checkbox.

---

**For your convenience, a definition of the action is provided below.**

**Biellmann Spin:** A spin where the skater grabs their free blade and pulls the heel of their boot behind and above the level of the head, creating a split position with the head and back arched upward. Look for the distinctive "teardrop" shape formed by the skater's body.

---

The following videos are examples of **well-trimmed** clips of the **Biellmann Spin** action in **figure skating**.

Note that some examples may be **bad examples** (e.g., they may not contain the desired action). This should be a rare occurrence, but if it happens please select the "Bad Example" checkbox.

Also note that some examples may have **on-screen text containing "Biellmann Spin"**. This should also be a rare occurrence, but if it happens please select the relevant checkbox.

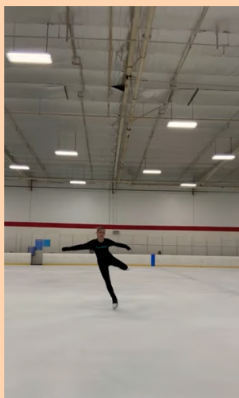

Bad Example

Onscreen Text has Action Name

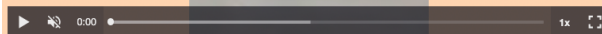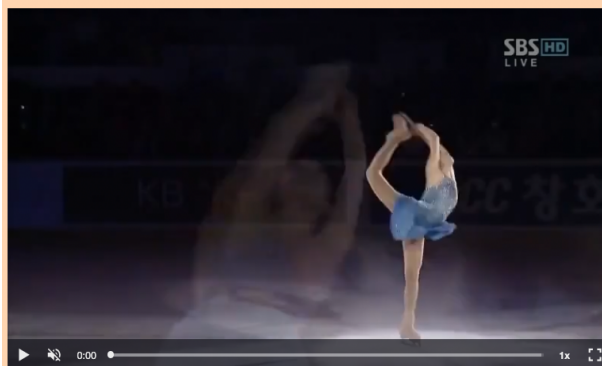

Bad Example

Onscreen Text has Action Name

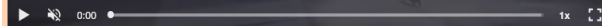

The videos below contain **poorly trimmed clips**.

The clips are denoted by the yellow bar; their start and end times are denoted by the cyan markers

Please fix the trimmings. Once you are done processing a clip, you must preview your trimming by pressing the blue button.

In the rare case where one of the clips below does not contain the desired action, please select the "Missing Desired Action" checkbox.

On the other hand, if the clip contains multiple instances of the desired action, please include only one instance in your trimming.  
(You may choose which one to include.)

| Original Clip                                                                                                                                                                                                                                                                                                                                                                                                                                                                                                 | Your New Trimming                                                                                                                                                                                                                                                            |
|---------------------------------------------------------------------------------------------------------------------------------------------------------------------------------------------------------------------------------------------------------------------------------------------------------------------------------------------------------------------------------------------------------------------------------------------------------------------------------------------------------------|------------------------------------------------------------------------------------------------------------------------------------------------------------------------------------------------------------------------------------------------------------------------------|
|  <div style="display: flex; justify-content: space-around; margin-top: 10px;"> <div data-bbox="331 932 500 991">Move clip's <b>start</b> to current position in video</div> <div data-bbox="526 932 695 991">Move clip's <b>end</b> to current position in video</div> <div data-bbox="727 932 883 991" style="background-color: #4a90e2; color: white; padding: 5px 15px; border-radius: 4px;">Preview</div> </div>         |  <div style="margin-top: 10px;"> <input type="checkbox"/> Missing Desired Action<br/> <input type="checkbox"/> My updated clip contains the on-screen text "Biellmann Spin"         </div> |
|  <div style="display: flex; justify-content: space-around; margin-top: 10px;"> <div data-bbox="331 1386 500 1444">Move clip's <b>start</b> to current position in video</div> <div data-bbox="526 1386 695 1444">Move clip's <b>end</b> to current position in video</div> <div data-bbox="727 1386 883 1444" style="background-color: #4a90e2; color: white; padding: 5px 15px; border-radius: 4px;">Preview</div> </div> |                                                                                                                                                                                                                                                                              |

We are currently piloting this study interface. Please provide any feedback on it below.

Type your feedback here

Submit

Figure 17. **Benchmark Clip Trimming UI**. The number of well-trimmed examples varies; for the action above, the true number is 5, but only 2 are shown for brevity. Similarly, the number of poorly-trimmed clips also varies.

## C. Model Evaluation

Our entire evaluation code will be made available on our GitHub repository for reproducibility. In this section, we highlight some of the important decisions we make in our evaluation setup.

### C.1. Evaluation Prompts

While we often tailor prompts to fit the expected input for each model (details on GitHub), they all closely resemble the following prompts.

#### 0-shot Prompt

Recall that `<a OR an> <ACTION> is <a OR an> <SUBDOMAIN> in <DOMAIN>.` Does the following video show `<a OR an> <ACTION>?` Please reason through your answer. It is critical that you output 'yes' or 'no' on the final line of your answer.

`<VIDEO>`

#### 3-shot Prompt

The following 3 videos show `<a OR an> <ACTION>`, which is `<a OR an> <SUBDOMAIN> in <DOMAIN>.`

`<VIDEO EXAMPLES>`

Now consider the following video. Is it also `<a OR an> <ACTION>?` Please reason through your answer. It is critical that you output 'yes' or 'no' on the final line of your answer.

`<VIDEO>`

The `<SUBDOMAIN>` field defaults to the string "action", but we sometimes provide a more descriptive word in its place (e.g., some American Football actions are classified under the subdomain of "run").

The `<a OR an>` field is either the string "a" or the string "an" depending on if the word it precedes begins with a vowel.

The 1-shot and 2-shot prompts are nearly identical to the 3-shot prompt above and can be found on our GitHub repository. They are omitted here for brevity.

## C.2. Video Sampling

We generally use the video sampling techniques recommended by the authors of each model. In certain cases, we place an upper bound on frame sampling due to compute constraints.

- InternVL3-8B [64]: uniformly sample, max 64 frames.
- Qwen2.5-VL [2]: one frame per second (fps).
- LLaVA-Video-7B [62]: uniformly sample, max 110 frames.
- Molmo2-4B: four fps, max 64 frames.
- Gemini 2.5 Flash & Gemini 2.5 Pro [50]: one fps.
- GPT-4o, GPT-4.1, GPT-5 [39–41]: one fps, max 110 frames.

## C.3. Context Lengths

For the open models, these numbers reflect a shared maximum on the number of tokens in both the input and output. For closed models, we have separate maximums for the input tokens and output tokens.

- InternVL3-8B: 8,192 tokens total
- Qwen2.5-VL: 128,000 tokens total
- LLaVA-Video-7B: 32,768 tokens total
- Molmo2-4B: 6,656 tokens total
- Gemini 2.5 Flash & Gemini 2.5 Pro: 1,048,576 input tokens; 65,536 output tokens
- GPT-4o: 128,000 input tokens; 16,384 output tokens
- GPT-4.1: 1,047,576 input tokens; 32,768 output tokens
- GPT-5: 400,000 input tokens; 128,000 output tokens

## C.4. Proprietary Model Versions

We used the following versions of proprietary models.

- gemini-2.5-flash-preview-04-17
- gemini-2.5-pro-preview-03-25
- gpt4o-2024-11-20
- gpt-4.1-2025-04-14
- gpt-5-2025-08-07

## D. Zero-shot Ablations

Tables 8 and 9 contains category-level results for GPT-4o and GPT-4.1 with 1 frame per second (fps) sampling and 2 fps sampling. We also provide results for GPT-4.1 in a 4 fps setting. (As noted in Appendix C, we feed no more than 110 frames to the GPT models.)

GPT-4.1 sees little difference in its performance upon varying the FPS, suggesting that a lack of frames is *not* the primary roadblock to achieving better performance on our benchmark. Additional analysis can be found in § 5.1. NB we chose GPT-4.1 over GPT-5 for the 4fps ablation due to its longer context length (1M vs. 400k) and better performance in the 1fps 3-shot setting (72.71% vs. 72.45%).

Table 10 contains category-level results for all models in the typical zero-shot setup of providing an input video, as well as two ablations: one where only the frame located at the (temporal) middle of the video is provided, and one where a definition of the action (as described in § 3.1) is provided alongside the video. In general, performance is best when a definition is provided alongside the video, and worst when only the middle frame is provided. Additional analysis can be found in Section 5.

Table 8. **Impact of higher FPS sampling in 0-shot.** Performance gain from the previous setup is highlighted in blue. If the model is sufficiently strong, like GPT-4.1, the additional frames do not seem to significantly boost performance on the domain-specific action recognition task.

| Model   | FPS | Beauty | Crafts | Dance | Food  | Hobbies | Medical | Sports | Overall       |
|---------|-----|--------|--------|-------|-------|---------|---------|--------|---------------|
| GPT-4o  | 1   | 71.90  | 73.25  | 61.10 | 86.49 | 63.79   | 66.15   | 65.72  | 66.76         |
|         | 2   | 76.92  | 73.87  | 63.80 | 84.49 | 64.68   | 67.60   | 67.64  | 68.21 (+1.45) |
| GPT-4.1 | 1   | 73.39  | 75.00  | 64.18 | 87.37 | 65.57   | 74.00   | 67.59  | 69.02         |
|         | 2   | 76.23  | 74.89  | 66.54 | 86.91 | 66.69   | 73.30   | 67.78  | 69.85 (+0.83) |
|         | 4   | 75.70  | 75.14  | 66.53 | 87.23 | 66.11   | 73.78   | 69.19  | 69.93 (+0.08) |

Table 9. **Impact of higher FPS sampling in 3-shot.** Performance gain from the previous setup is highlighted in blue and loss in red. The decrease in performance for GPT-4.1 suggests that the model struggles to handle the increase in visual tokens caused by the 3-shot, multi-fps setting. Interestingly, GPT-4o handles the additional tokens well, despite having a shorter context length (128k vs 1M).

| Model   | FPS | Beauty | Crafts | Dance | Food  | Hobbies | Medical | Sports | Overall       |
|---------|-----|--------|--------|-------|-------|---------|---------|--------|---------------|
| GPT-4o  | 1   | 72.58  | 71.64  | 70.76 | 87.11 | 66.97   | 71.00   | 66.94  | 70.12         |
|         | 2   | 9.11   | 70.79  | 71.34 | 86.75 | 68.76   | 75.00   | 67.75  | 70.99 (+0.87) |
| GPT-4.1 | 1   | 75.21  | 74.37  | 73.16 | 88.89 | 71.04   | 76.02   | 68.03  | 72.71         |
|         | 2   | 75.29  | 72.62  | 76.09 | 89.59 | 68.72   | 72.73   | 67.49  | 71.22 (-1.49) |
|         | 4   | 80.56  | 85.00  | 74.25 | 86.73 | 70.51   | 69.49   | 68.58  | 71.15 (-0.07) |

Table 10. **Zero-shot results while varying video inputs.** Performance gain from the previous setup is highlighted in blue and loss in red. The Molmo2-4B base model has a decrease in performance when shifting from providing the video’s middle frame to providing the full-video input. The only other model where this occurs is InternVL3-8B, which is the worst-performing VLM we tested. This suggests that Molmo2 struggles to make effective use of video data. This further suggests that fine-tuning (with our data) an open-weight model which more effectively utilizes the full-video input, such as Qwen2.5-VL or LLaVA-Video, may lead to even better performance than our fine-tuned Molmo2 model.

| Model            | Input         | Beauty       | Crafts       | Dance        | Food         | Hobbies      | Medical      | Sports       | Overall              |
|------------------|---------------|--------------|--------------|--------------|--------------|--------------|--------------|--------------|----------------------|
| Gemini 2.5 Flash | Middle Frame  | 60.33        | 66.79        | 60.00        | 79.43        | 59.92        | 59.39        | 57.91        | 61.56                |
|                  | Video         | 70.18        | 72.69        | 59.90        | 86.05        | 63.85        | 69.15        | 60.62        | 65.14 (+3.58)        |
|                  | Video w/ Def. | <b>76.11</b> | 69.23        | 63.22        | 86.56        | 64.10        | 70.74        | 59.49        | 65.56 (+0.42)        |
| Gemini 2.5 Pro   | Middle Frame  | 66.13        | 65.30        | 57.33        | 78.87        | 58.38        | 66.00        | 56.56        | 60.49                |
|                  | Video         | 74.19        | 73.51        | 62.26        | 87.37        | 62.71        | 72.36        | 60.99        | 65.78 (+5.29)        |
|                  | Video w/ Def. | 70.16        | 70.90        | 64.18        | 86.60        | 63.40        | 70.85        | 58.71        | 65.29 (-0.49)        |
| GPT-4o           | Middle Frame  | 69.35        | 62.31        | 60.46        | 79.12        | 63.00        | 57.00        | 61.07        | 63.27                |
|                  | Video         | 71.90        | 73.25        | 61.10        | 86.49        | 63.79        | 66.15        | 65.72        | 66.76 (+3.49)        |
|                  | Video w/ Def. | 70.73        | 73.60        | 64.86        | 86.01        | 63.93        | 70.05        | 66.86        | 67.19 (+0.43)        |
| GPT-4.1          | Middle Frame  | 67.74        | 68.66        | 61.78        | 81.44        | 62.61        | 64.00        | 61.01        | 64.27                |
|                  | Video         | 73.39        | 75.00        | 64.18        | 87.37        | 65.57        | 74.00        | 67.59        | 69.02 (+4.75)        |
|                  | Video w/ Def. | 73.39        | 75.48        | 65.87        | 87.11        | 66.11        | 72.00        | 66.61        | 69.12 (+0.10)        |
| GPT-5            | Middle Frame  | 69.35        | 70.30        | 63.42        | 83.76        | 63.58        | 69.50        | 62.94        | 66.02                |
|                  | Video         | 75.00        | 77.53        | <b>70.07</b> | <b>88.40</b> | 67.61        | <b>79.50</b> | <b>68.32</b> | <b>71.51 (+5.49)</b> |
|                  | Video w/ Def. | 75.00        | <b>79.39</b> | 69.67        | 88.25        | <b>68.83</b> | 76.88        | 66.88        | 71.36 (-0.15)        |
| InternVL3-8B     | Middle Frame  | 54.84        | 47.39        | 52.76        | 66.75        | 53.36        | 54.50        | 55.37        | 54.74                |
|                  | Video         | 54.03        | 51.12        | 54.69        | 64.18        | 47.25        | 54.00        | 51.63        | 52.16 (-2.58)        |
|                  | Video w/ Def. | 54.03        | 52.24        | 55.89        | 72.16        | 52.98        | 53.00        | 54.07        | 55.54 (+3.38)        |
| Qwen2.5-VL-7B    | Middle Frame  | 53.23        | 48.88        | 50.96        | 65.72        | 53.44        | 53.50        | 51.71        | 53.29                |
|                  | Video         | 50.00        | 51.20        | 50.00        | 72.16        | 55.58        | 58.00        | 53.26        | 55.01 (+1.72)        |
|                  | Video w/ Def. | 62.10        | 57.46        | 53.85        | 73.20        | 56.19        | 54.50        | 55.54        | 57.24 (+2.23)        |
| LLaVA-Video-7B   | Middle Frame  | 57.26        | 50.37        | 52.28        | 66.24        | 54.28        | 55.00        | 54.32        | 54.85                |
|                  | Video         | 58.87        | 57.84        | 51.32        | 70.36        | 54.74        | 58.00        | 54.89        | 55.98 (+1.13)        |
|                  | Video w/ Def. | 54.84        | 58.96        | 51.44        | 76.29        | 55.05        | 59.50        | 53.50        | 56.26 (+0.28)        |
| Molmo2-4B (base) | Middle Frame  | 53.13        | 53.63        | 51.96        | 57.19        | 53.36        | 55.18        | 58.50        | 55.19                |
|                  | Video         | 51.61        | 49.70        | 54.42        | 73.20        | 54.48        | 52.50        | 51.52        | 54.35 (-0.84)        |
|                  | Video w/ Def. | 61.29        | 54.57        | 51.19        | 77.58        | 57.28        | 57.00        | 51.21        | 56.12 (+1.77)        |
| Molmo2-4B (FT)   | Middle Frame  | 65.32        | 58.69        | 58.33        | 70.36        | 58.86        | 65.00        | 56.89        | 59.66                |
|                  | Video         | 75.00        | 69.66        | 66.84        | 76.03        | 66.51        | 71.00        | 63.33        | 67.36 (+7.70)        |
|                  | Video w/ Def. | 69.35        | 68.90        | 62.24        | 79.38        | 63.81        | 72.00        | 61.67        | 65.64 (-1.72)        |

## E. Few-shot Results

This section includes category-level results for VLMs, results for traditional computer vision models in a modified evaluation setting, and a discussion of prompt sensitivity & yes/no bias in Gemini 2.5 Pro.

### E.1. Category-level Results for VLMs

Table 11 contains category-level results for all models from Figure 5 in the 0-shot, 1-shot, 2-shot, and 3-shot setups. Also provided are results for Qwen2.5-VL-72B, which surpasses all existing 7B models we evaluated in the 0-shot setting.

Table 11. **Few-shot results.** Performance gain from the previous setup is highlighted in blue and loss in red. The gains from few-shot examples are particularly remarkable for the 72B Qwen model and the 8B InternVL model.

| Model            | <i>k</i> -shot | Beauty       | Crafts       | Dance        | Food         | Hobbies      | Medical      | Sports       | Overall              |
|------------------|----------------|--------------|--------------|--------------|--------------|--------------|--------------|--------------|----------------------|
| Gemini 2.5 Flash | 0              | 70.18        | 72.69        | 59.90        | 86.05        | 63.85        | 69.15        | 60.72        | 65.14                |
|                  | 1              | 79.82        | 72.47        | 67.69        | 91.05        | 65.46        | 69.75        | 61.12        | 67.88 (+2.74)        |
|                  | 2              | 79.05        | 73.66        | 68.65        | 87.21        | 65.25        | 71.88        | 62.15        | 68.07 (+0.19)        |
|                  | 3              | 77.32        | 68.72        | 67.83        | <b>91.86</b> | 64.33        | 70.00        | 61.77        | 67.55 (-0.52)        |
| Gemini 2.5 Pro   | 0              | 74.19        | 73.51        | 62.26        | 87.37        | 62.71        | 72.36        | 60.99        | 65.78                |
|                  | 1              | 72.58        | 74.63        | 67.79        | 88.40        | 65.08        | 68.84        | 62.70        | 67.99 (+2.21)        |
|                  | 2              | 71.67        | 75.00        | 68.27        | 89.69        | 64.52        | 68.21        | 59.85        | 67.18 (-0.81)        |
|                  | 3              | 74.17        | 75.75        | 69.23        | 88.66        | 65.49        | 70.77        | 59.41        | 67.68 (+0.50)        |
| GPT-4o           | 0              | 71.90        | 73.25        | 61.10        | 86.49        | 63.79        | 66.15        | 65.72        | 66.76                |
|                  | 1              | 70.00        | 68.85        | 66.09        | 84.94        | 65.28        | 69.63        | 66.78        | 68.18 (+1.42)        |
|                  | 2              | 67.77        | 67.81        | 67.78        | 83.86        | 67.18        | 70.53        | 67.67        | 69.17 (+0.99)        |
|                  | 3              | 72.58        | 71.64        | 70.76        | 87.11        | 66.97        | 71.00        | 66.94        | 70.12 (+0.95)        |
| GPT-4.1          | 0              | 73.39        | 75.00        | 64.18        | 87.37        | 65.57        | 74.00        | 67.59        | 69.02                |
|                  | 1              | 78.23        | 73.46        | 73.16        | 88.60        | 67.77        | 72.86        | 68.24        | 71.67 (+2.65)        |
|                  | 2              | 78.15        | 74.03        | 73.42        | 86.77        | 68.82        | 74.21        | 67.59        | 71.76 (+2.09)        |
|                  | 3              | 75.21        | 74.37        | 73.16        | 88.89        | <b>71.04</b> | 76.02        | 68.03        | 72.71 (+0.95)        |
| GPT-5            | 0              | 75.00        | 77.53        | 70.07        | 88.40        | 67.61        | <b>79.50</b> | 68.32        | 71.51                |
|                  | 1              | <b>79.84</b> | <b>79.70</b> | <b>74.00</b> | 90.21        | 68.97        | 74.00        | <b>68.45</b> | <b>72.90</b> (+1.39) |
|                  | 2              | 72.58        | 77.24        | 72.00        | 90.72        | 68.94        | 75.50        | 67.40        | 71.95 (-0.95)        |
|                  | 3              | 75.00        | 79.10        | 73.44        | 89.95        | 70.72        | 73.50        | 66.21        | 72.45 (+0.50)        |
| InternVL3-8B     | 0              | 54.03        | 51.12        | 54.69        | 64.18        | 47.25        | 54.00        | 51.63        | 52.16                |
|                  | 1              | 68.55        | 52.61        | 54.33        | 68.30        | 53.06        | 66.00        | 57.98        | 57.06 (+4.90)        |
|                  | 2              | 56.45        | 57.46        | 52.64        | 69.59        | 53.52        | 66.50        | 55.21        | 56.19 (-0.87)        |
|                  | 3              | 59.68        | 58.21        | 55.77        | 77.32        | 56.27        | 62.50        | 54.56        | 58.07 (+1.88)        |
| Qwen2.5-VL-7B    | 0              | 50.00        | 51.12        | 50.00        | 72.16        | 55.58        | 58.00        | 53.26        | 55.01                |
|                  | 1              | 55.65        | 52.61        | 55.53        | 67.27        | 51.38        | 57.00        | 51.47        | 54.07 (-0.94)        |
|                  | 2              | 58.06        | 55.97        | 52.76        | 71.13        | 55.66        | 55.50        | 54.89        | 56.35 (+2.28)        |
|                  | 3              | 67.50        | 56.10        | 58.00        | 73.31        | 55.00        | 60.00        | 54.15        | 57.57 (+1.22)        |
| LLaVA-Video-7B   | 0              | 58.87        | 57.84        | 51.32        | 70.36        | 54.74        | 58.00        | 54.89        | 55.98                |
|                  | 1              | 61.29        | 58.96        | 54.69        | 72.16        | 53.90        | 58.50        | 55.21        | 56.78 (+0.80)        |
|                  | 2              | 58.06        | 56.34        | 52.40        | 68.04        | 54.82        | 60.00        | 55.05        | 56.03 (-0.75)        |
|                  | 3              | 62.10        | 57.84        | 55.65        | 77.32        | 55.66        | 60.50        | 56.43        | 58.35 (+2.32)        |
| Qwen2.5-VL-72B   | 0              | 59.84        | 58.49        | 54.39        | 78.50        | 57.26        | 63.50        | 55.13        | 58.43                |
|                  | 3              | 59.00        | 65.81        | 60.53        | 84.07        | 61.35        | 68.25        | 59.06        | 63.16 (+4.73)        |

## E.2. Results for Traditional Models

We also evaluate traditional models (i.e., models that are not VLMs) on VideoNet. In particular, we evaluate 4 recent CLIP models [38, 52, 53, 61] and the 3 convolutional neural networks (CNNs) from [9]. All of the CLIP models except [61] were designed for video inputs; following [52], we uniformly sample 8 frames from the video and average their features when evaluating [61].

These models do not natively support visual question answering with natural language. They also cannot be provided multiple in-context videos. Hence, we adapt our few-shot evaluation setup for these traditional models. We have two separate adaptations: one designed for the CLIP models, one for the CNNs.

In the first, we get CLIP scores for all clips in VideoNet with their corresponding all-lowercase text labels formatted as "`«DOMAIN» «ACTION»`" (e.g., "figure skating biellmann spin"). We then search for the *optimal threshold* on a balanced<sup>6</sup> validation set constructed from clips in VideoNet which do NOT appear in the test set. To do so, we compute the validation accuracy for all candidate thresholds where the validation accuracy can change.<sup>7</sup> Concretely, if the CLIP score exceeds or equals the threshold, the CLIP model’s answer to the test set question is considered "yes"; otherwise, the answer is considered "no". At last, after finding the optimal threshold on the validation set, we present the model with the test set, which contains the same pairs of clips and actions that VLMs see in the normal VideoNet evaluation setup. The results for this setup are in Table 12. The CLIP models struggle immensely, falling short of every VLM we tested. To alleviate concerns that the validation set may have been too small to find a decent threshold, we also search for the optimal threshold directly on the test set in Table 13. Still, the CLIP models struggle, suggesting that they are ill suited for this task.

Table 12. **CLIP results.** Even the best CLIP model fails to match the worst VLM we evaluated, InternVL3-8B. Given that random chance is 50%, these results indicate that CLIP models struggle on the domain-specific action recognition task. NB "acc." is short for accuracy.

| Model           | Test Acc. (%) | Val Acc. (%) | Threshold |
|-----------------|---------------|--------------|-----------|
| ViCLIP          | 51.45         | 52.21        | 0.2002    |
| LongCLIP-L      | 52.14         | 52.44        | 0.6938    |
| VideoCLIP-XL-v2 | 50.67         | 52.21        | 0.2087    |
| X-CLIP-L/14     | 50.18         | 51.75        | 0.1224    |

<sup>6</sup>Here, "balanced" denotes that, if the validation set is thought of as containing binary questions, then precisely half the validation set contains binary positive questions (i.e., binary questions where the answer is "yes").

<sup>7</sup>Our validation set contains 2,174 questions. Hence, there are at most 2,175 critical points at which the validation accuracy can change.

Table 13. **CLIP results when "cheating".** The optimal threshold is now computed over the test set rather than the validation set. The poor results remain, with the best CLIP model beating only the worst VLM, InternVL3-8B. This suggests that the CLIP architecture, rather than the size of our validation set, is at fault for the CLIP models’ lackluster performance on VideoNet.

| Model           | Test Acc. (%) | Threshold |
|-----------------|---------------|-----------|
| ViCLIP          | 53.47         | 0.2121    |
| LongCLIP-L      | 53.29         | 0.7400    |
| VideoCLIP-XL-v2 | 52.83         | 0.1969    |
| X-CLIP-L/14     | 51.10         | 0.1272    |

The CNNs extract video features from videos, but do not provide a way to align these video features to text. Accordingly, we opt for a k-nearest neighbors classifier (kNN) approach in evaluating the CNNs. In particular, we extract video features from the 3 in-context examples provided in VideoNet for each action and use these features as the support set for a kNN. The kNN then classifies the test samples based on Euclidean distance. We try all  $k \in \{1, 2, 3\}$ . It is worth noting that no two VideoNet clips for any given action are taken from the same source video, minimizing concerns about a kNN "hacking" correct answers via factors like the video background. The kNN is deemed to answer "does the following video show X" with a "yes" if it classifies the test sample as action X, and "no" if it classifies the test sample as another action. For comparison, we also evaluate the two best CLIP models using this approach by feeding their video features to a kNN. As shown in Table 14, the best CNN, Two-Stream I3D, rivals the best CLIP models. In doing so, it falls short of most open models and considerably far behind all closed models. Similar to CLIP, the I3D models seem poorly suited for the domain-specific action recognition task.

Table 14. **CNN results.** Rows sorted by top-5 accuracy on Kinetics [27]. With some exceptions, higher VideoNet accuracy tends to be correlated with better performance on Kinetics.

| Model          | VideoNet Accuracy (%) |         |         | Kinetics Top-5 Accuracy (%) |
|----------------|-----------------------|---------|---------|-----------------------------|
|                | $k = 1$               | $k = 2$ | $k = 3$ |                             |
| ViCLIP         | 54.58                 | 53.73   | 53.36   | 98.2                        |
| Two-Stream I3D | 54.55                 | 53.26   | 53.03   | 91.3                        |
| RGB-I3D        | 53.52                 | 52.56   | 52.09   | 89.3                        |
| Flow-I3D       | 53.03                 | 52.46   | 52.45   | 84.9                        |
| LongCLIP-L     | 54.12                 | 52.87   | 52.55   | -                           |

## E.3. Prompt Sensitivity & Yes/No Bias

We observe that model performance on positive clips and negative clips changes significantly when in-context examples are provided (see Table 16). Given the poor performance of open models on our benchmark, we focus on analyzing

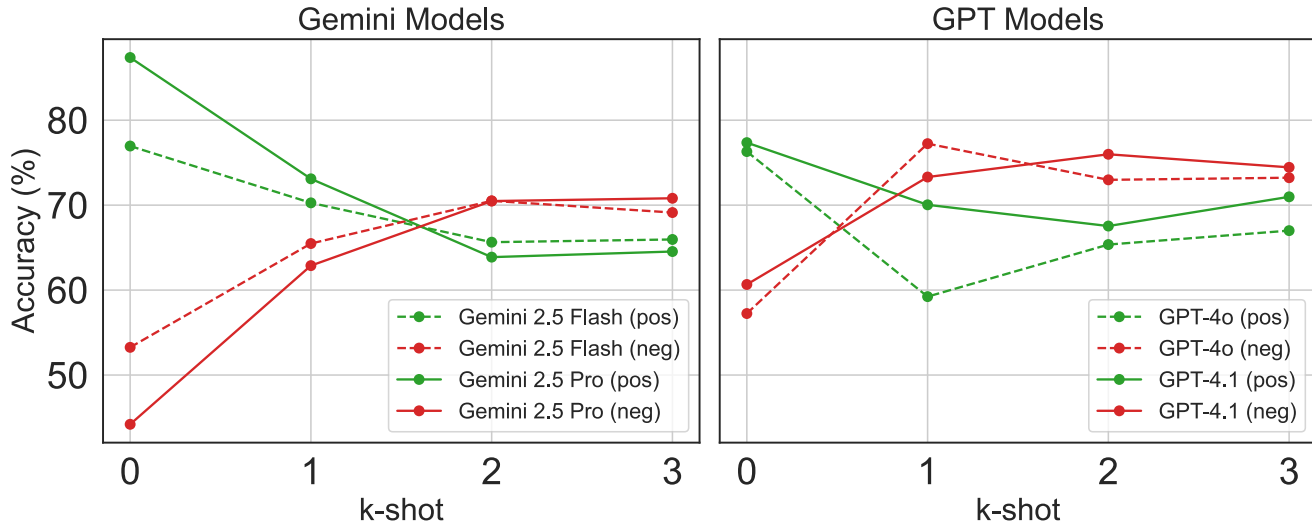

Figure 18. **Positive & negative accuracy with in-context examples.** Accuracy on positive clips is in green; accuracy on negative clips is in red. In both plots, the weaker model is shown with dashed lines, while the stronger reasoning model is shown with solid lines. Note that the GPT models (right), which attain a higher accuracy on VideoNet than the Gemini models (left), see smaller changes in their yes/no bias as additional few-shot examples are provided.

the behavior of Gemini and GPT models (see Figure 18).

Gemini 2.5 Pro exhibits a stark pattern, performing better on negative clips and worse on positive clips as additional in-context examples are provided. GPT-4.1 exhibits a similar pattern, but to a much lesser (and thus, “more acceptable”) extent. We believe there are two main hypotheses to explain this phenomenon. One is that Gemini 2.5 Pro over-emphasizes insignificant details from the the in-context examples (e.g., background composition, camera angle, etc.) as opposed to the fine-grained details of the action at-hand. The other is this behavior can be attributed to our prompt.

We test the latter hypothesis by constructing two prompts (see ): a “lenient” prompt which should bias models towards saying “yes”, and a “balanced” prompt which attempts to eliminate any unintended bias introduced by few-shot examples. (As discussed previously, our “default” prompt seems to bias the model towards saying “no”.) We tailor these prompts based on how they impact performance in the weaker models (Qwen, LLaVA, Intern, Gemini), before evaluating their impact on the two strongest models (GPT-4o and GPT-4.1). Table 15 confirms that even the strongest models are NOT robust to slight changes in the prompt. Surprisingly, the overall accuracy is relatively unaffected by these changes.

Given that small differences in the prompt cause dramatic shifts in yes/no accuracies, we hypothesize that such “prompt sensitivity” is an indicator that these models are not confident in their answers. This is reminiscent of early generations of LLMs, which were often not confident in their answers and hence would easily change their answers based on the

smallest of pushback from the user [63].

Table 15. **Prompt sensitivity in GPT models.** The first table shows numbers for GPT-4o; the second shows numbers for GPT-4.1. Reading the first two numeric columns top-to-bottom, we see that accuracies on positive and negative clips change drastically with the choice of prompt. However, reading down the last column, the accuracy across all clips exhibits minimal change. The trend remains equally present in both tables despite GPT-4.1’s stronger performance (69.02% vs 66.76%) on VideoNet.

| Prompt                                 | Accuracy (%)   |                |           |
|----------------------------------------|----------------|----------------|-----------|
|                                        | Positive Clips | Negative Clips | All Clips |
| <b>Default</b><br><i>biases “no”</i>   | 67.00          | 73.23          | 70.12     |
| <b>Balanced</b><br><i>minimal bias</i> | 77.55          | 62.46          | 70.11     |
| <b>Lenient</b><br><i>biases “yes”</i>  | 87.20          | 55.21          | 71.22     |

| Prompt                                 | Accuracy (%)   |                |           |
|----------------------------------------|----------------|----------------|-----------|
|                                        | Positive Clips | Negative Clips | All Clips |
| <b>Default</b><br><i>biases “no”</i>   | 70.98          | 74.45          | 72.71     |
| <b>Balanced</b><br><i>minimal bias</i> | 84.73          | 59.44          | 72.12     |
| <b>Lenient</b><br><i>biases “yes”</i>  | 90.13          | 53.94          | 72.06     |

Table 16. **Performance on positive vs. negative clips with in-context examples.** Although the benchmark contains the same number of positive and negative clips, the entries in the last column may not be exact averages of the entries in the prior two columns. This is because certain clips are incompatible inputs for certain models (e.g., Gemini rejects certain American Football videos as being too violent).

| <b>Model Name</b> | <b><i>k</i>-shot</b> | <b>Positive Clips</b> | <b>Negative Clips</b> | <b>Overall</b> |
|-------------------|----------------------|-----------------------|-----------------------|----------------|
| Gemini 2.5 Flash  | 0                    | 76.96                 | 53.26                 | 65.14          |
|                   | 1                    | 70.27                 | 65.48                 | 67.88          |
|                   | 2                    | 65.64                 | 70.51                 | 68.07          |
|                   | 3                    | 65.96                 | 69.13                 | 67.55          |
| Gemini 2.5 Pro    | 0                    | 87.38                 | 44.20                 | 65.78          |
|                   | 1                    | 73.10                 | 62.88                 | 67.99          |
|                   | 2                    | 63.88                 | 70.48                 | 67.18          |
|                   | 3                    | 64.54                 | 70.81                 | 67.68          |
| GPT-4o            | 0                    | 76.31                 | 57.24                 | 66.76          |
|                   | 1                    | 59.23                 | 77.24                 | 68.18          |
|                   | 2                    | 65.36                 | 72.98                 | 69.17          |
|                   | 3                    | 67.00                 | 73.23                 | 70.12          |
| GPT-4.1           | 0                    | 77.36                 | 60.66                 | 69.02          |
|                   | 1                    | 70.04                 | 73.31                 | 71.67          |
|                   | 2                    | 67.54                 | 75.99                 | 71.76          |
|                   | 3                    | 70.98                 | 74.45                 | 72.71          |
| GPT-5             | 0                    | 73.16                 | 69.86                 | 71.51          |
|                   | 1                    | 61.10                 | 84.69                 | 72.90          |
|                   | 2                    | 58.26                 | 85.64                 | 71.95          |
|                   | 3                    | 60.12                 | 84.77                 | 72.45          |
| InternVL3-8B      | 0                    | 48.94                 | 55.38                 | 52.16          |
|                   | 1                    | 62.19                 | 51.93                 | 57.06          |
|                   | 2                    | 59.61                 | 52.76                 | 56.19          |
|                   | 3                    | 68.68                 | 47.47                 | 58.07          |
| Qwen2.5-VL-7B     | 0                    | 51.61                 | 58.42                 | 55.01          |
|                   | 1                    | 20.98                 | 87.17                 | 54.07          |
|                   | 2                    | 32.84                 | 79.85                 | 56.35          |
|                   | 3                    | 36.12                 | 78.90                 | 57.57          |
| LLaVA-Video-7B    | 0                    | 78.79                 | 33.16                 | 55.98          |
|                   | 1                    | 29.35                 | 84.22                 | 56.78          |
|                   | 2                    | 47.70                 | 64.35                 | 56.03          |
|                   | 3                    | 65.82                 | 50.87                 | 58.35          |
| Qwen2.5-VL-72B    | 0                    | 59.45                 | 57.42                 | 58.43          |
|                   | 3                    | 72.64                 | 53.44                 | 63.16          |

### **Default 3-shot Prompt**

The following 3 videos show examples of <a OR an> <ACTION>, which is <a OR an> <SUBDOMAIN> in <DOMAIN>.

<VIDEO EXAMPLES>

Now consider the following video. Is it also <a OR an> <ACTION>?

Please reason through your answer. It is critical that you output 'yes' or 'no' on the final line of your answer.

### **Balanced 3-shot Prompt**

The following 3 videos show examples of <a OR an> <ACTION>, which is <a OR an> <SUBDOMAIN> in <DOMAIN>.

<VIDEO EXAMPLES>

Now consider the following video. Is it also <a OR an> <ACTION>?

An appropriate instance of <ACTION> must include all essential defining elements, but minor variations or slight differences in style or execution are acceptable. Analyze carefully, explicitly noting the presence or absence of essential elements, while considering natural variations. Clearly explain your reasoning and justify your final decision. It is critical that you output 'yes' or 'no' on the final line of your answer.

### **Lenient 3-shot Prompt**

The following 3 videos show examples of <a OR an> <ACTION>, which is <a OR an> <SUBDOMAIN> in <DOMAIN>.

<VIDEO EXAMPLES>

Now consider the following video. Is it also <a OR an> <ACTION>?

Focus on identifying the core defining elements rather than expecting an exact match to the examples. The action may have natural variations in execution while still being the same action. Please reason through your answer. It is critical that you output 'yes' or 'no' on the final line of your answer.

Figure 19. **Default, Balanced, and Lenient Prompts.** Observe that there are only small differences between each prompt.

## F. Benchmark Qualitative Analysis

In Section 5.1, we offer a systematic analysis of why VLMs struggle on VideoNet. Here, we take a qualitative approach to understanding what causes VLMs to fail at the domain-specific action recognition task.

Open models—which are weaker across existing video benchmarks—suffer from failures that are not unique to our tasks. This includes degenerative behavior such as generating the same sentence repeatedly until the max token count is reached, failing to follow the prompt or answer the question, and reasoning towards one answer but outputting a different final answer. They also fail due to fundamental perception errors, i.e., claiming that an atomic action (such as a soccer ball hitting a goal post) occurs when it simply does not.

Among closed models, the vast majority of failures arise from these aforementioned perception failures (see Figure 22). The failures persist despite the inclusion of in-context examples. Furthermore, the detailed reasoning presented by these models—even when no action definition is provided—confirms that *their language backbones have a sufficient understanding of the actions* in VideoNet to answer the questions. (See Figure 20 for a zero-shot example where the model has adequate world knowledge; see Figure 21 for a similar example with in-context demonstrations.) Thus, it is the vision component of these systems that limits their performance.

We provide three concrete examples of model success and failure below. These examples are sourced from Gemini 2.5 Pro because of its extensive reasoning traces. We use examples from the Figure Skating domain since (1) its questions are especially difficult since actions usually cannot be answered with a single frame, and (2) its short clip length allows the videos to be compressed into the storyframes printed below.

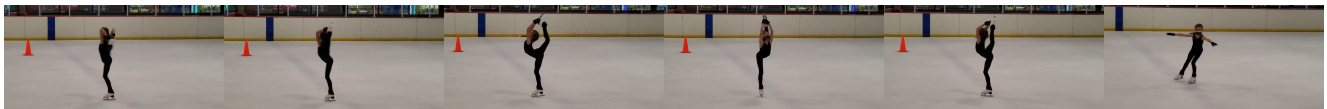

A Biellmann Spin is characterized by the skater spinning in an upright position while pulling their free leg up from behind towards their head, holding the skate blade with both hands, so the leg is extended vertically above and behind the head.

In the video:

The skater is performing an upright spin.

The skater reaches back with both hands to grab the blade of their free skate.

The skater pulls the free leg up so that it is extended vertically above and behind their head.

All the defining characteristics of a Biellmann Spin are present in the video from approximately 0:01 to 0:04.

**Figure 20. Language grounding success.** In a 0-shot setting without the action definition, Gemini 2.5 Pro provides the *correct* response above when asked if the video above contains a Biellmann Spin. This demonstrates the ability of the strongest closed models to clearly delineate the visual elements that must be present in the video for the answer to be “yes”.

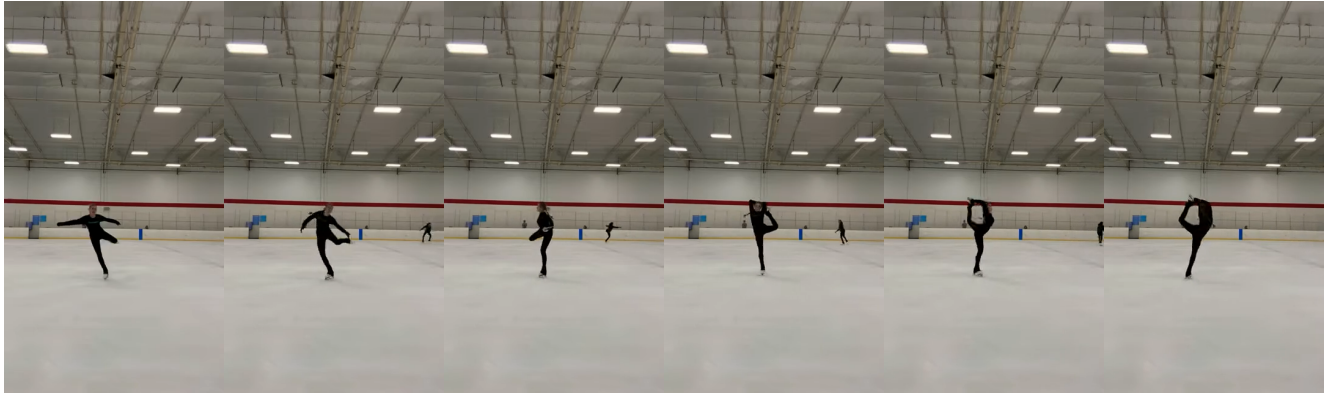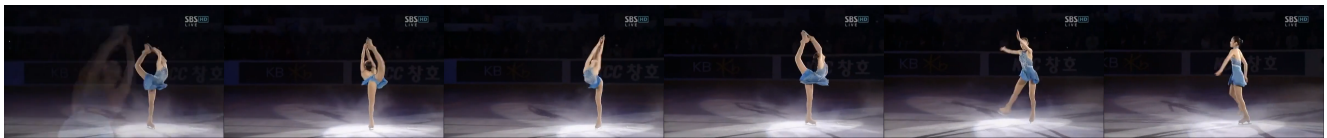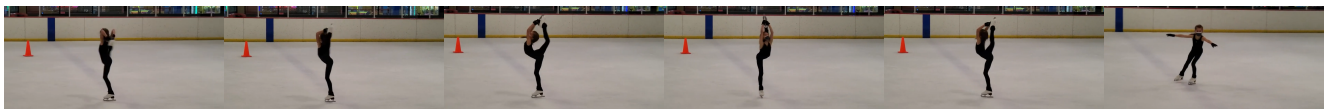

Okay, let's break down the characteristics of a Biellmann Spin based on the first two videos:

1. Upright Spin: The skater spins on one leg while maintaining a generally upright torso position (though arched backward).
2. Free Leg Position: The skater lifts their free leg backward and upward.
3. Grip: The skater reaches back with both hands to grasp the skate blade (or sometimes the boot) of the free leg.
4. Final Pose: The free leg is pulled up high, typically above and behind the head, causing the skater's back to arch significantly. This creates a distinctive teardrop-like shape.

Now let's examine the third video:

- The skater is performing an upright spin on one leg.
- She lifts her free leg backward and upward.
- She reaches back with both hands and grasps the skate blade of her free leg.
- She pulls the leg up above and behind her head, arching her back into the characteristic Biellmann pose.

All the key elements identified in the example videos are present in the third video.

Figure 21. **Visual grounding success.** In a 2-shot setting without the action definition, Gemini 2.5 Pro is provided the first two videos and asked if the third video contains a Biellmann Spin. It provides the *correct* response printed above.

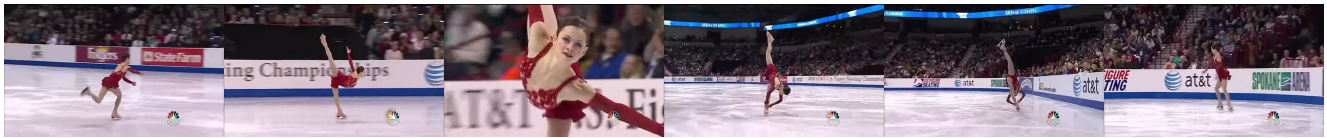

A Biellmann Spin is characterized by the skater spinning in an upright position while pulling one leg up from behind towards their head, with the skate typically held above and behind the head.

In the video:

The skater begins an upright spin.  
Around the 0:05 mark, she reaches back with both hands, grabs the blade of her free skate, and pulls her leg up over her head.  
She holds this position, spinning with her leg extended vertically above and behind her head, until around the 0:10 mark.

This action perfectly matches the description of a Biellmann Spin.

**Figure 22. Perception failure example.** In a 0-shot setting without the action definition, Gemini 2.5 Pro provides this *incorrect* response. Crucially, the model claims that the skater “reaches back with both hands and grabs the blade of her free skate” – this never happens in the frames above.

## G. Human Evaluation

We have four versions of the human evaluation UI, depending on if the human is shown few-shot examples and whether they are shown the action definition. For brevity, only one of these setups is shown. The HTML/CSS for all four configurations is available on our GitHub repository. Both humans and models are shown silenced videos since the clips sometimes have audio containing the action name.

In Table 17, we show the breakdown of human performance on VideoNet with different configurations, namely 0-shot vs. 3-shot and with vs. without definition. We additionally report the performance with random negatives to better understand the sources of human errors.

Across the board, we see humans excel at identifying positive clips, achieving high accuracy (above 85%) even without definitions or examples. They even attain accuracies above 91% when provided with examples (in the 3-shot setting). However, humans struggle with identifying negative clips, especially in the hard negative setup. Despite being given 3 example videos and a definition, humans get only 71.92%, while the 0-shot with-definition configuration attains a mere 51.58%.

Promisingly, we see a steady improvement in negative clip accuracy as more in-context examples and the action definition are provided. In fact, 3-shot humans armed with action definitions achieve notably high accuracy on random negatives (95.42%), nearly solving the task.

Overall, these findings suggest that while providing definitions and in-context examples significantly helps humans distinguish general in-domain actions, additional domain expertise or perceptual skills might be needed to reliably differentiate highly similar actions.

Table 17. **Human performance on VideoNet.** Metrics are reported separately for positive clips, negative clips, and overall accuracy across different negative sampling strategies (hard vs random). For reference, the best 3-shot video model, GPT-4.1, achieves an overall accuracy of 72.71% and 77.43% on hard and random negatives, respectively.

| <b>Human Evaluation</b>   | <b>Positive Clips</b> | <b>Negative Clips</b> | <b>Overall</b> |
|---------------------------|-----------------------|-----------------------|----------------|
| <i>Hard Negatives</i>     |                       |                       |                |
| 0-shot without definition | 85.96                 | 43.27                 | 64.61          |
| 0-shot with definition    | 86.53                 | 51.58                 | 69.05          |
| 3-shot without definition | 91.98                 | 65.61                 | 78.80          |
| 3-shot with definition    | <b>93.41</b>          | <b>71.92</b>          | <b>82.66</b>   |
| <i>Random Negatives</i>   |                       |                       |                |
| 0-shot with definition    | <b>93.41</b>          | 69.63                 | 81.52          |
| 3-shot with definition    | 91.69                 | <b>95.42</b>          | <b>93.55</b>   |

## H. Additional Training Details

This appendix elaborates on Section 4.

### H.1. Dataset Construction

In Section 4.1 we explained how we derive sets of clips with one action label each. Here we walk through the construction of VQA pairs from those labeled clips.

During training, we construct three questions from each clip: one binary question where the answer is “yes” (i.e., binary positive), one binary question where the answer is “no” (i.e., binary negative), and one multiple-choice question (i.e., MCQ). For the binary negative question, we randomly select one action that is not the ground truth from the action list for that domain. For the MCQ, we randomly choose three negative options that are not the ground truth from the action list for the relevant domain. Although the VideoNet benchmark only consists of binary questions, initial experiments showed that including MCQs in the training mixture improves binary accuracy. We also experimented with 10-way MCQs (i.e., a MCQ with 9 negative distractors), but decided against it because it induced a much higher *binary bias* (which we define as the absolute difference between binary positive accuracy and binary negative accuracy).

### H.2. Training Setup

In Section 4.2 we detailed the model architecture and our frame sampling approach. Here we include additional information on our training procedure. During training, we train the ViT, the connector, and the LLM using learning rates  $5 \times 10^{-6}$ ,  $5 \times 10^{-6}$  and  $1 \times 10^{-5}$  respectively. We employ a cosine learning rate decay to 0.1 of the initial learning rate. Following [13], the connector uses features from the third-to-last and ninth-from-last ViT layers. For each frame,  $3 \times 3$  patch windows are pooled into a single vector using a multi-headed attention layer, where the mean of the patches serves as the query and the pooled features are projected using an MLP to the LLM’s token space. For each training video sample, we pack multiple question-answer (QA) pairs. The LLM attention mask is customized such that text from one QA pair does not attend to the text from another pair. (As mentioned above (§H.1), each video clip is accompanied by three QA pairs.) For additional inquiries about the model, please refer to [11].

## I. Data Filtering Strategies

The three data filtering strategies we employed are briefly described in Section 4.1. Here we explain our intuition behind each filtering strategy, the per-domain yields of each strategy, the category-level results of post-training a Molmo2-4B model on each strategy, and a brief analysis of these training results.

We began with the hypothesis that having as many independent signals align as possible would yield the highest-quality labels. There were two signals that were easily extracted at scale: the presence of an action in the video’s title (“title match”), and the presence of an action in the video’s transcript (“transcript match”). Adhering to our philosophy of having an *extremely strict filter*, we chose to require the action to be said within one second of the clip for the “transcript match” to count. This resulted in the `TRANSCRIPTLOCALIZEDTITLEMATCH` filter. While our hypothesis of such a strict filter yielding high-quality data was largely confirmed by initial experiments on domains like skateboarding, this filter’s yield was too low on domains like whittling and fencing (see Table 18). A natural solution to increasing the number of clips yielded by a filter is to relax the filter’s strictness. Hence, we dropped the title match requirement, thereby keeping all clips with a transcript match; this is the `TRANSCRIPTLOCALIZED` filter. In many cases, `TRANSCRIPTLOCALIZED` yielded more clips than `TRANSCRIPTLOCALIZEDTITLEMATCH`, largely solving our problem of low yields. Once we had derived a filter (`TRANSCRIPTLOCALIZED`) by relaxing the title match requirement of `TRANSCRIPTLOCALIZEDTITLEMATCH`, it seemed fitting to derive a filter by relaxing the transcript match requirement. After some experimentation, we landed on `SINGLEACTION`. The intuition here is that if there is a title match, then the video is likely to contain at least one clip of that action; if our localizer only finds one clip of that domain, then that clip must be of the title action. To make an analogy to the classic pigeonhole problem, if there is one pigeon (i.e., action from the title) and only one hole (i.e., clip found by localizer), then the pigeon must be assigned to that hole (i.e., the title action must be assigned to the one and only clip). Thus we arrived at our filtering strategies.

We train three models, one each for the data yielded by each filtering strategy. The overall accuracies of these models are reported in Table 5, as are category-level results. Domain-level results are in Table 7. Even though `SINGLEACTION` attains the best overall performance on VideoNet, it only achieves the best performance on 19 out of 38 domains, affirming the domain-to-domain variation in filtering strategy effectiveness.

Perusing these tables, the question naturally arises: why do certain filtering strategies fare better than others in terms of downstream performance on VideoNet? Unlike other tasks [24] where dataset size has a profound impact on down-

stream performance, the filter with the best VideoNet performance is actually the smallest in size. Hence, scale itself cannot explain the differences in downstream performance. Rather, we hypothesize that downstream performance is primarily impacted by *clip quality and intra-domain uniformity*. Concretely, clip quality refers to the accuracy with which action labels are assigned to clips by a filtering strategy, and intra-domain uniformity refers to the extent to which the counts of clips labeled by each action (within a domain) follows the uniform distribution. The intuition for the former is trivial; for the latter, since the test set presents a uniform # of questions for each action in a domain, we believe that a training dataset which contains an equal numbers of clips for each action within a domain is poised to perform best.<sup>8</sup>

Clip quality is difficult to measure at a statistically significant scale without employing a large army of experts, so we focus on quantifying the intra-domain uniformity. For each of the 38 domains, we calculate the Shannon entropy for the distribution of clips yielded by each of the three filtering strategies.<sup>9</sup> For each domain, this yields three entropy numbers; one per filtering strategy. Recall that a higher entropy suggests a more uniform distribution [14]. Hence, for each domain, we can order the filtering strategies by entropy; in doing so, we are ordering the filtering strategies by the uniformity of their data for that domain. We can also order the filtering strategies by their downstream accuracy on that domain’s subset of VideoNet. This gives two orderings for each domain. If the orderings are identical, then for that domain there is undeniably a correlation between higher entropy (and thus higher intra-domain uniformity) and downstream performance.<sup>10</sup> In our case, there are **10 domains** where the orderings are identical. Recall that we are trying to ascertain whether there is a correlation between intra-domain uniformity and downstream performance; the existence of such a correlation would result in *more* than average identical pairings, so we shall test in that direction.

Since there are 3 filtering strategies, there are  $3! = 6$  possible orderings, and  $3! \times 3! = 36$  pairs of orderings. Of these 36 pairs, only 6 pairs exist where both orderings are the same. Thus, there is a  $p = \frac{6}{36} = \frac{1}{6}$  probability of two 3-item orderings being the same. Since we repeat this analysis of comparing entropy orderings and accuracy orderings for 38

<sup>8</sup>Additionally, given that certain filtering strategies yield quite skewed distributions for certain domains—e.g., the `TRANSCRIPTLOCALIZED` gym data contains nearly 30k clips of `squats`—we believe that seeing such a disproportionate number of squat clips during training will make the model worse at discerning other gym actions such as pushups or deadlifts.

<sup>9</sup>The “distribution of clips” is a list of integers, where each integer gives the count for the number of clips labeled with a particular action. This list’s length equals the number of actions in that domain.

<sup>10</sup>Of course, a correlation could exist even if the orderings are not exactly the same, but statistical tests like Spearman’s rank correlation or the Pearson correlation do not provide statistically significant results for  $n = 3$ . Hence we are forced to limit our analysis to cases where there is a perfect correlation (in these cases, Spearman’s coefficient is 1.)

domains,<sup>11</sup> this process can be modeled by a binomial distribution with  $n = 38$  and  $p = \frac{1}{6}$ . Formally,  $X \sim \text{Bin}(38, \frac{1}{6})$  where  $X$  is the number of domains with identical pairings. Let the null hypothesis be that this process is purely random (i.e., that entropy has no effect on accuracy). Since we are wondering if the number of identical pairings is *better* than average, we can use a one-tailed test. We compute  $P(X \geq 10) = 0.08902$ . A p-value of 0.089 is ambiguous. Under the commonly-used significance level of 0.05, we would fail to reject the null hypothesis and find that there is no correlation between intra-domain uniformity and downstream accuracy. However, given that we hypothesized that clip quality *and* intra-clip distribution impact downstream performance but only tested for the latter, we believe this finding actually supports our hypothesis.<sup>12</sup> In other words, we advocate for interpreting the p-value of 0.089 as suggesting both a correlation between intra-domain uniformity and downstream performance *and* the presence of a confounding variable. Namely, we believe this confounding variable to be clip quality, although we present no evidence in support of this claim.

---

<sup>11</sup>We assume the yields and accuracies to be independent between domains.

<sup>12</sup>In this sentence, “hypothesis” refers to our original hypothesis from three paragraphs ago, not the null hypothesis established in this paragraph.

Table 18. **Filtering strategy yields.** The last three columns list yields for the filtering strategies in decreasing order of total yield: `TRANSCRIPTLOCALIZED`, `TRANSCRIPTLOCALIZEDTITLEMATCH`, and `SINGLEACTION`. For a given row, compare the relative ranking of values in the last three columns of this table to the relative ranking of values in the last three columns of Table 19; such a comparison proves that the yield of a filtering strategy is a poor indicator of downstream performance on the VideoNet benchmark.

| Category Name      | Domain Name                | # Actions | Transcript Localized | Transcript Localized Title Match | Single Action |
|--------------------|----------------------------|-----------|----------------------|----------------------------------|---------------|
| Beauty & Self Care | Hairstyling                | 14        | <b>5,775</b>         | 2,029                            | 1,401         |
|                    | Spa Massage                | 11        | <b>3,259</b>         | 1,351                            | 759           |
|                    | Tattooing                  | 6         | <b>782</b>           | 145                              | <b>782</b>    |
| Crafts & Art       | Calligraphy                | 8         | <b>5,508</b>         | 231                              | 105           |
|                    | Crochet                    | 38        | 7,565                | 4,572                            | <b>10,990</b> |
|                    | Hand Sewing / Embroidery   | 41        | 688                  | 460                              | <b>6,552</b>  |
|                    | Knots                      | 55        | <b>4,099</b>         | 3,889                            | 20,371        |
|                    | Painting                   | 8         | <b>2,949</b>         | 1,472                            | 489           |
|                    | Pottery                    | 10        | <b>5,889</b>         | 3,077                            | 817           |
|                    | Woodworking / Whittling    | 4         | <b>1,140</b>         | 29                               | 11            |
| Dance              | Ballet                     | 39        | <b>17,362</b>        | 5,567                            | 3,471         |
|                    | Bharatanatyam              | 24        | 862                  | 316                              | <b>3,200</b>  |
|                    | Break Dance                | 34        | <b>2,573</b>         | 1,507                            | 395           |
|                    | Salsa                      | 21        | <b>8,436</b>         | 2,036                            | 2,432         |
|                    | Tap Dance                  | 29        | <b>13,130</b>        | 3,579                            | 1,400         |
| Food & Beverage    | Bartending                 | 30        | 2,017                | 1,273                            | 389           |
|                    | Coffee                     | 16        | <b>3,369</b>         | 2,440                            | 611           |
|                    | Cooking                    | 51        | <b>82,814</b>        | 35,530                           | 2,878         |
| Hobbies            | Bouldering                 | 23        | 2,275                | 950                              | <b>5,391</b>  |
|                    | Gardening                  | 20        | <b>4,064</b>         | 2,298                            | 1,471         |
|                    | Gym                        | 22        | <b>79,793</b>        | 68,869                           | 21,333        |
|                    | Juggling                   | 26        | <b>1,582</b>         | 941                              | 348           |
|                    | Parkour                    | 40        | 6,425                | 4,035                            | <b>7,109</b>  |
|                    | Pen Spinning               | 33        | <b>6,877</b>         | 2,827                            | 2,318         |
|                    | Skateboarding              | 49        | <b>52,851</b>        | 10,079                           | 16,910        |
| Medical            | Yo-yo                      | 55        | <b>6,754</b>         | 3,530                            | 2,257         |
|                    | Neurological Abnormalities | 21        | <b>2,912</b>         | 983                              | 433           |
|                    | Neurological Assessments   | 15        | <b>820</b>           | 381                              | 319           |
|                    | Suturing                   | 14        | 751                  | 417                              | <b>1,443</b>  |
| Sports             | American Football          | 54        | <b>36,327</b>        | 13,610                           | 11,664        |
|                    | Basketball                 | 46        | <b>82,883</b>        | 13,213                           | 11,219        |
|                    | Cheerleading               | 23        | 1,027                | 622                              | <b>3,504</b>  |
|                    | Cricket                    | 46        | <b>8,457</b>         | 3,614                            | 7,033         |
|                    | Fencing                    | 20        | <b>2,058</b>         | 667                              | 918           |
|                    | Figure Skating             | 40        | <b>17,525</b>        | 2,709                            | 4,592         |
|                    | Ice Hockey                 | 39        | <b>4,258</b>         | 1,960                            | 2,247         |
|                    | Soccer                     | 43        | <b>12,120</b>        | 4,251                            | 4,388         |
|                    | Tennis                     | 19        | <b>3,404</b>         | 2,128                            | 1,187         |
| <i>All</i>         | <i>All</i>                 | 1,087     | <b>501,380</b>       | 207,587                          | 163,137       |

Table 19. **Per-domain performance of different filtering strategies.** The last three columns contain accuracy percentages for the three filtering strategies in decreasing order of total yield: `TRANSCRIPTLOCALIZED`, `TRANSCRIPTLOCALIZEDTITLEMATCH`, and `SINGLEACTION`. Please keep the number of questions for each domain, listed in the third column, in mind when considering the significance of a change in accuracy. Note that the base model achieves the best performance for calligraphy, coffee, and fencing, suggesting that our training data for these domains is poorly-labeled.

| Category Name      | Domain Name                | # Questions | Base Model   | Transcript Localized | Transcript Localized Title Match | Single Action |
|--------------------|----------------------------|-------------|--------------|----------------------|----------------------------------|---------------|
| Beauty & Self Care | Hairstyling                | 56          | 50.00        | 73.21                | <b>76.79</b>                     | 75.00         |
|                    | Spa Massage                | 44          | 52.27        | <b>81.82</b>         | 72.73                            | <b>81.82</b>  |
|                    | Tattooing                  | 24          | 54.17        | 62.50                | <b>66.67</b>                     | 62.50         |
| Crafts & Art       | Calligraphy                | 32          | <b>56.25</b> | 53.13                | <b>56.25</b>                     | 53.13         |
|                    | Crochet                    | 152         | 51.97        | 57.24                | 60.53                            | <b>65.79</b>  |
|                    | Hand Sewing / Embroidery   | 164         | 42.68        | 63.41                | 56.71                            | <b>73.17</b>  |
|                    | Knots                      | 220         | 49.09        | 67.27                | 67.27                            | <b>73.18</b>  |
|                    | Painting                   | 32          | 62.50        | 68.75                | 62.50                            | <b>71.88</b>  |
|                    | Pottery                    | 40          | 57.50        | <b>77.50</b>         | 70.00                            | 70.00         |
|                    | Woodworking / Whittling    | 16          | 50.00        | 56.25                | <b>62.50</b>                     | 50.00         |
| Dance              | Ballet                     | 156         | 51.92        | 69.23                | 65.38                            | <b>69.87</b>  |
|                    | Bharatanatyam              | 96          | 53.13        | 57.29                | 59.38                            | <b>69.79</b>  |
|                    | Break Dance                | 136         | 66.18        | <b>67.65</b>         | 64.71                            | 66.18         |
|                    | Salsa                      | 84          | 47.62        | <b>71.43</b>         | 67.86                            | 67.86         |
|                    | Tap Dance                  | 116         | 50.00        | 57.76                | <b>63.79</b>                     | 60.34         |
| Food & Beverage    | Bartending                 | 120         | 74.17        | <b>90.00</b>         | 80.83                            | 77.50         |
|                    | Coffee                     | 64          | <b>75.00</b> | 73.44                | 67.19                            | 64.06         |
|                    | Cooking                    | 204         | 72.06        | 73.04                | 74.51                            | <b>78.92</b>  |
| Hobbies            | Bouldering                 | 92          | 50.00        | <b>58.70</b>         | 52.17                            | 51.09         |
|                    | Gardening                  | 80          | 68.75        | <b>86.25</b>         | 81.25                            | 77.50         |
|                    | Gym                        | 88          | 68.18        | 76.14                | 75.00                            | <b>79.55</b>  |
|                    | Juggling                   | 104         | 48.08        | <b>64.42</b>         | 60.58                            | 62.50         |
|                    | Parkour                    | 160         | 60.62        | 71.25                | 70.63                            | <b>71.88</b>  |
|                    | Pen Spinning               | 132         | 50.00        | <b>68.94</b>         | 60.61                            | 66.67         |
|                    | Skateboarding              | 196         | 50.51        | 55.61                | 55.61                            | <b>63.78</b>  |
|                    | Yo-yo                      | 220         | 50.45        | <b>64.55</b>         | 64.09                            | 64.09         |
| Medical            | Neurological Abnormalities | 84          | 48.81        | <b>67.86</b>         | 60.71                            | 61.90         |
|                    | Neurological Assessments   | 60          | 58.33        | 73.33                | 65.00                            | <b>76.67</b>  |
|                    | Suturing                   | 56          | 51.79        | 67.86                | 66.07                            | <b>78.57</b>  |
| Sports             | American Football          | 216         | 51.39        | 55.09                | 58.80                            | <b>59.72</b>  |
|                    | Basketball                 | 184         | 44.02        | 55.98                | 59.24                            | <b>59.78</b>  |
|                    | Cheerleading               | 92          | 57.61        | 79.35                | 77.17                            | <b>88.04</b>  |
|                    | Cricket                    | 184         | 51.09        | 55.43                | 58.15                            | <b>59.24</b>  |
|                    | Fencing                    | 80          | <b>53.75</b> | 51.25                | 51.25                            | 52.50         |
|                    | Figure Skating             | 160         | 52.50        | 63.13                | 62.50                            | <b>66.87</b>  |
|                    | Ice Hockey                 | 156         | 55.77        | 64.74                | 64.10                            | <b>69.23</b>  |
|                    | Soccer                     | 172         | 51.16        | 55.23                | <b>61.05</b>                     | 60.47         |
|                    | Tennis                     | 76          | 51.32        | 63.16                | <b>65.79</b>                     | 60.53         |
| <i>All</i>         | <i>All</i>                 | 4,348       | 54.35        | 65.11                | 64.21                            | <b>67.36</b>  |

## References

- [1] Anthropic. Claude can now search the web, 2025. 3
- [2] Shuai Bai, Keqin Chen, Xuejing Liu, Jialin Wang, Wenbin Ge, Sibao Song, Kai Dang, Peng Wang, Shijie Wang, Jun Tang, Humen Zhong, Yuanzhi Zhu, Mingkun Yang, Zhaohai Li, Jianqiang Wan, Pengfei Wang, Wei Ding, Zheren Fu, Yiheng Xu, Jiabo Ye, Xi Zhang, Tianbao Xie, Zesen Cheng, Hang Zhang, Zhibo Yang, Haiyang Xu, and Junyang Lin. Qwen2.5-vl technical report, 2025. 5, 14
- [3] Max Bain, Jaesung Huh, Tengda Han, and Andrew Zisserman. Whisperx: Time-accurate speech transcription of long-form audio. *INTERSPEECH 2023*, 2023. 5
- [4] Hritik Bansal, Yonatan Bitton, Idan Szepke, Kai-Wei Chang, and Aditya Grover. Videocon: Robust video-language alignment via contrast captions, 2023. 4
- [5] Tom B. Brown, Benjamin Mann, Nick Ryder, Melanie Subbiah, Jared Kaplan, Prafulla Dhariwal, Arvind Neelakantan, Pranav Shyam, Girish Sastry, Amanda Askell, Sandhini Agarwal, Ariel Herbert-Voss, Gretchen Krueger, Tom Henighan, Rewon Child, Aditya Ramesh, Daniel M. Ziegler, Jeffrey Wu, Clemens Winter, Christopher Hesse, Mark Chen, Eric Sigler, Mateusz Litwin, Scott Gray, Benjamin Chess, Jack Clark, Christopher Berner, Sam McCandlish, Alec Radford, Ilya Sutskever, and Dario Amodei. Language models are few-shot learners, 2020. 1, 7
- [6] Giovanni Buccino, Ferdinand Binkofski, and Lucia Riggio. The mirror neuron system and action recognition. *Brain and Language*, 89:370–376, 2004. 7
- [7] James Burgess, Xiaohan Wang, Yuhui Zhang, Anita Rau, Alejandro Lozano, Lisa Dunlap, Trevor Darrell, and Serena Yeung-Levy. Video action differencing, 2025. 2
- [8] Mu Cai, Reuben Tan, Jianrui Zhang, Bocheng Zou, Kai Zhang, Feng Yao, Fangrui Zhu, Jing Gu, Yiwu Zhong, Yuzhang Shang, Yao Dou, Jaden Park, Jianfeng Gao, Yong Jae Lee, and Jianwei Yang. Temporalbench: Towards fine-grained temporal understanding for multimodal video models. *arXiv preprint arXiv:2410.10818*, 2024. 2
- [9] Joao Carreira and Andrew Zisserman. Quo vadis, action recognition? a new model and the kinetics dataset, 2018. 5, 18
- [10] Joao Carreira, Eric Noland, Chloe Hillier, and Andrew Zisserman. A short note on the kinetics-700 human action dataset, 2022. 2
- [11] Christopher Clark, Jieyu Zhang, Zixian Ma, Jae Sung Park, Rohun Tripathi, Sangho Lee, Mohammadreza Salehi, Jason Ren, Chris Dongjoo Kim, Yinuo Yang, Vincent Shao, Yue Yang, Weikai Huang, Ziqi Gao, Taira Anderson, Jianrui Zhang, Jitesh Jain, George Stoica, Ali Farhadi, and Ranjay Krishna. Molmo 2: Open weights and open data for state-of-the-art video and image models, 2025. Technical Report. 5, 8, 27
- [12] Florian Daniel, Pavel Kucherbaev, Cinzia Cappiello, Boualem Benatallah, and Mohammad Allahbakhsh. Quality control in crowdsourcing: A survey of quality attributes, assessment techniques, and assurance actions. *ACM Comput. Surv.*, 51(1), 2018. 3
- [13] Matt Deitke, Christopher Clark, Sangho Lee, Rohun Tripathi, Yue Yang, Jae Sung Park, Mohammadreza Salehi, Niklas Muennighoff, Kyle Lo, Luca Soldaini, Jiasen Lu, Taira Anderson, Erin Bransom, Kiana Ehsani, Huong Ngo, Yen-Sung Chen, Ajay Patel, Mark Yatskar, Chris Callison-Burch, Andrew Head, Rose Hendrix, Favyen Bastani, Eli VanderBilt, Nathan Lambert, Yvonne Chou, Arnavi Chheda, Jenna Sparks, Sam Skjonsberg, Michael Schmitz, Aaron Sarnat, Byron Bischoff, Pete Walsh, Chris Newell, Piper Wolters, Tanmay Gupta, Kuo-Hao Zeng, Jon Borchardt, Dirk Groeneveld, Crystal Nam, Sophie Lebrecht, Caitlin Wittlif, Carissa Schoenick, Oscar Michel, Ranjay Krishna, Luca Weihs, Noah A. Smith, Hannaneh Hajishirzi, Ross Girshick, Ali Farhadi, and Aniruddha Kembhavi. Molmo and pixmo: Open weights and open data for state-of-the-art vision-language models. In *CVPR*, 2025. 27
- [14] Holger Dell, Dieter van Melkebeek, and Mahnaz Akbari. Lecture 17: Randomness extractors, 2013. 28
- [15] Bosheng Ding, Chengwei Qin, Linlin Liu, Yew Ken Chia, Boyang Li, Shafiq Joty, and Lidong Bing. Is GPT-3 a good data annotator? In *Proceedings of the 61st Annual Meeting of the Association for Computational Linguistics (Volume 1: Long Papers)*, pages 11173–11195, Toronto, Canada, 2023. Association for Computational Linguistics. 5
- [16] Alexey Dosovitskiy, Lucas Beyer, Alexander Kolesnikov, Dirk Weissenborn, Xiaohua Zhai, Thomas Unterthiner, Mostafa Dehghani, Matthias Minderer, Georg Heigold, Sylvain Gelly, Jakob Uszkoreit, and Neil Houlsby. An image is worth 16x16 words: Transformers for image recognition at scale. In *ICLR*, 2021. 5
- [17] Kristen Grauman et al. Ego-exo4d: Understanding skilled human activity from first- and third-person perspectives, 2024. 2
- [18] Bernard Ghanem Fabian Caba Heilbron, Victor Escorcia and Juan Carlos Niebles. Activitynet: A large-scale video benchmark for human activity understanding. In *Proceedings of the IEEE Conference on Computer Vision and Pattern Recognition*, pages 961–970, 2015. 2
- [19] Rong Gao, Xin Liu, Zhuozhao Hu, Bohao Xing, Baiqiang Xia, Zitong Yu, and Heikki Kälviäinen. Fsbench: A figure skating benchmark for advancing artistic sports understanding. *2025 IEEE/CVF Conference on Computer Vision and Pattern Recognition (CVPR)*, pages 13595–13605, 2025. 2
- [20] Silvio Giancola, Mohieddine Amine, Tarek Dghaily, and Bernard Ghanem. Soccernet: A scalable dataset for action spotting in soccer videos. In *The IEEE Conference on Computer Vision and Pattern Recognition (CVPR) Workshops*, 2018. 2
- [21] Kristen Grauman, Andrew Westbury, Eugene Byrne, Zachary Chavis, Antonino Furnari, Rohit Girdhar, Jackson Hamburger, Hao Jiang, Miao Liu, Xingyu Liu, Miguel Martin, Tushar Nagarajan, Ilija Radosavovic, Santhosh Kumar Ramakrishnan, Fiona Ryan, Jayant Sharma, Michael Wray, Mengmeng Xu, Eric Zhongcong Xu, Chen Zhao, Siddhant Bansal, Dhruv Batra, Vincent Cartillier, Sean Crane, Tien Do, Morrie Doulaty, Akshay Erapalli, Christoph Feichtenhofer, Adriano Fragomeni, Qichen Fu, Abraham Gebreselasie, Cristina González, James Hillis, Xuhua Huang, Yifei Huang, Wenqi

- Jia, Weslie Khoo, Jáchym Kolář, Satwik Kottur, Anurag Kumar, Federico Landini, Chao Li, Yanghao Li, Zhenqiang Li, Kartikeya Mangalam, Raghava Modhugu, Jonathan Munro, Tullie Murrell, Takumi Nishiyasu, Will Price, Paola Ruiz, Merey Ramazanova, Leda Sari, Kiran Somasundaram, Audrey Southerland, Yusuke Sugano, Ruijie Tao, Minh Vo, Yuchen Wang, Xindi Wu, Takuma Yagi, Ziwei Zhao, Yunyi Zhu, Pablo Arbeláez, David Crandall, Dima Damen, Giovanni Maria Farinella, Christian Fuegen, Bernard Ghanem, Vamsi Krishna Ithapu, C. V. Jawahar, Hanbyul Joo, Kris Kitani, Haizhou Li, Richard Newcombe, Aude Oliva, Hyun Soo Park, James M. Rehg, Yoichi Sato, Jianbo Shi, Mike Zheng Shou, Antonio Torralba, Lorenzo Torresani, Mingfei Yan, and Jitendra Malik. Ego4d: Around the world in 3,000 hours of egocentric video. In *Proceedings of the IEEE/CVF Conference on Computer Vision and Pattern Recognition (CVPR)*, pages 18995–19012, 2022. 2, 4
- [22] Chunhui Gu, Chen Sun, David A. Ross, Carl Vondrick, Caroline Pantofaru, Yeqing Li, Sudheendra Vijayanarasimhan, George Toderici, Susanna Ricco, Rahul Sukthankar, Cordelia Schmid, and Jitendra Malik. Ava: A video dataset of spatio-temporally localized atomic visual actions, 2018. 2
- [23] Xiaofan Gu, Xinwei Xue, and Feng Wang. Fine-grained action recognition on a novel basketball dataset. In *ICASSP 2020 - 2020 IEEE International Conference on Acoustics, Speech and Signal Processing (ICASSP)*, pages 2563–2567, 2020. 2
- [24] Etash Guha, Ryan Marten, Sedrick Keh, Negin Raoof, Georgios Smyrnis, Hritik Bansal, Marianna Nezhurina, Jean Mercat, Trung Vu, Zayne Sprague, Ashima Suvarna, Benjamin Feuer, Liangyu Chen, Zaid Khan, Eric Frankel, Sachin Grover, Caroline Choi, Niklas Muennighoff, Shiye Su, Wanxia Zhao, John Yang, Shreyas Pimpalgaonkar, Kartik Sharma, Charlie Cheng-Jie Ji, Yichuan Deng, Sarah Pratt, Vivek Ramanujan, Jon Saad-Falcon, Jeffrey Li, Achal Dave, Alon Albalak, Kushal Arora, Blake Wulfe, Chinmay Hegde, Greg Durrett, Sewoong Oh, Mohit Bansal, Saadia Gabriel, Aditya Grover, Kai-Wei Chang, Vaishaal Shankar, Aaron Gokaslan, Mike A. Merrill, Tatsunori Hashimoto, Yejin Choi, Jenia Jitsev, Reinhard Heckel, Maheswaran Sathiamoorthy, Alexandros G. Dimakis, and Ludwig Schmidt. Openthoughts: Data recipes for reasoning models, 2025. 5, 28
- [25] Derek L. Hansen, Patrick J. Schone, Douglas Corey, Matthew Reid, and Jake Gehring. Quality control mechanisms for crowdsourcing: peer review, arbitration, & expertise at familysearch indexing. In *Proceedings of the 2013 Conference on Computer Supported Cooperative Work*, page 649–660, New York, NY, USA, 2013. Association for Computing Machinery. 3
- [26] Wenyi Hong\*, Yean Cheng\*, Zhuoyi Yang\*, Weihang Wang, Lefan Wang, Xiaotao Gu, Shiyu Huang, Yuxiao Dong, and Jie Tang. Motionbench: Benchmarking and improving fine-grained video motion understanding for vision language models, 2024. 2
- [27] Will Kay, Joao Carreira, Karen Simonyan, Brian Zhang, Chloe Hillier, Sudheendra Vijayanarasimhan, Fabio Viola, Tim Green, Trevor Back, Paul Natsev, Mustafa Suleyman, and Andrew Zisserman. The kinetics human action video dataset, 2017. 18
- [28] Hildegard Kuehne, Hueihan Jhuang, Estíbaliz Garrote, Tomaso Poggio, and Thomas Serre. Hmdb: a large video database for human motion recognition. In *2011 International conference on computer vision*, pages 2556–2563. IEEE, 2011. 2
- [29] H. Kuehne, A. B. Arslan, and T. Serre. The language of actions: Recovering the syntax and semantics of goal-directed human activities. In *Proceedings of Computer Vision and Pattern Recognition Conference (CVPR)*, 2014. 2
- [30] Hongwei Li and Bin Yu. Error rate bounds and iterative weighted majority voting for crowdsourcing, 2014. 3
- [31] Yingwei Li, Yi Li, and Nuno Vasconcelos. Resound: Towards action recognition without representation bias. In *Proceedings of the European Conference on Computer Vision (ECCV)*, 2018. 2
- [32] Yixuan Li, Lei Chen, Runyu He, Zhenzhi Wang, Gangshan Wu, and Limin Wang. Multisports: A multi-person video dataset of spatio-temporally localized sports actions. In *Proceedings of the IEEE/CVF International Conference on Computer Vision (ICCV)*, pages 13536–13545, 2021. 2, 4
- [33] Shenglan Liu, Xiang Liu, Gao Huang, Hong Qiao, Lianyu Hu, Dong Jiang, Aibin Zhang, Yang Liu, and Ge Guo. Fsd-10: A fine-grained classification dataset for figure skating. *Neurocomputing*, 413:360–367, 2020. 2
- [34] Shenglan Liu, Aibin Zhang, Yunheng Li, Jian Zhou, Li Xu, Zhuben Dong, and Renhao Zhang. Temporal segmentation of fine-grained semantic action: A motion-centered figure skating dataset. In *Proceedings of the AAAI Conference on Artificial Intelligence*, 2021. 2
- [35] Sheng-Lan Liu, Yu-Ning Ding, Gang Yan, Si-Fan Zhang, Jin-Rong Zhang, Wen-Yue Chen, and Xue-Hai Xu. Fine-grained action analysis: A multi-modality and multi-task dataset of figure skating, 2024. 2
- [36] Sewon Min, Mike Lewis, Luke Zettlemoyer, and Hannaneh Hajishirzi. MetalCL: Learning to learn in context. In *Proceedings of the 2022 Conference of the North American Chapter of the Association for Computational Linguistics: Human Language Technologies*, pages 2791–2809, Seattle, United States, 2022. Association for Computational Linguistics. 1, 7
- [37] Mathew Monfort, Alex Andonian, Bolei Zhou, Kandan Ramakrishnan, Sarah Adel Bargal, Tom Yan, Lisa Brown, Quanfu Fan, Dan Gutfrueud, Carl Vondrick, and Aude Oliva. Moments in time dataset: one million videos for event understanding, 2019. 2
- [38] Bolin Ni, Houwen Peng, Minghao Chen, Songyang Zhang, Gaofeng Meng, Jianlong Fu, Shiming Xiang, and Haibin Ling. Expanding language-image pretrained models for general video recognition. 2022. 5, 18
- [39] OpenAI. Gpt-4o system card, 2024. 14
- [40] OpenAI, 2025.
- [41] OpenAI. Gpt-5, 2025. 14
- [42] Yulu Pan, Ce Zhang, and Gedas Bertasius. Basket: A large-scale video dataset for fine-grained skill estimation. *2025 IEEE/CVF Conference on Computer Vision and Pattern Recognition (CVPR)*, pages 28952–28962, 2025. 2

- [43] Marcus Rohrbach, Anna Rohrbach, Michaela Regneri, Sikan-dar Amin, Mykhaylo Andriluka, Manfred Pinkal, and Bernt Schiele. Recognizing fine-grained and composite activities using hand-centric features and script data. *International Journal of Computer Vision*, 119(3):346–373, 2015. 2
- [44] Olga Russakovsky, Jia Deng, Hao Su, Jonathan Krause, Sanjeev Satheesh, Sean Ma, Zhiheng Huang, Andrej Karpathy, Aditya Khosla, Michael Bernstein, Alexander C. Berg, and Li Fei-Fei. Imagenet large scale visual recognition challenge, 2015. 4, 5
- [45] Mohammadreza Salehi, Jae Sung Park, Tanush Yadav, Aditya Kusupati, Ranjay Krishna, Yejin Choi, Hannaneh Hajishirzi, and Ali Farhadi. Actionatlas: A videoqa benchmark for domain-specialized action recognition, 2024. 2, 3, 4
- [46] C. Schuldt, I. Laptev, and B. Caputo. Recognizing human actions: a local svm approach. In *Proceedings of the 17th International Conference on Pattern Recognition, 2004. ICPR 2004.*, pages 32–36 Vol.3, 2004. 2
- [47] Ziyao Shangguan, Chuhan Li, Yuxuan Ding, Yanan Zheng, Yilun Zhao, Tesca Fitzgerald, and Arman Cohan. Tomato: Assessing visual temporal reasoning capabilities in multimodal foundation models, 2024. 1, 2, 4
- [48] Dian Shao, Yue Zhao, Bo Dai, and Dahua Lin. Finegym: A hierarchical video dataset for fine-grained action understanding, 2020. 2
- [49] Khurram Soomro, Amir Roshan Zamir, and Mubarak Shah. Ucf101: A dataset of 101 human actions classes from videos in the wild, 2012. 2
- [50] Gemini Team. Gemini 1.5: Unlocking multimodal understanding across millions of tokens of context, 2024. 14
- [51] S. M Towhidul Islam Tonmoy, S M Mehedi Zaman, Vinija Jain, Anku Rani, Vipula Rawte, Aman Chadha, and Amitava Das. A comprehensive survey of hallucination mitigation techniques in large language models. *ArXiv*, abs/2401.01313, 2024. 3
- [52] Jiapeng Wang, Chengyu Wang, Kunzhe Huang, Jun Huang, and Lianwen Jin. Videoclip-xl: Advancing long description understanding for video clip models, 2024. 5, 18
- [53] Yi Wang, Yanan He, Yizhuo Li, Kunchang Li, Jiashuo Yu, Xin Ma, Xinhao Li, Guo Chen, Xinyuan Chen, Yaohui Wang, et al. Internvid: A large-scale video-text dataset for multimodal understanding and generation. In *ICLR*, 2023. 5, 18
- [54] Yi Wang, Kunchang Li, Xinhao Li, Jiashuo Yu, Yanan He, Chenting Wang, Guo Chen, Baoqi Pei, Rongkun Zheng, Jilan Xu, Zun Wang, et al. Internvideo2: Scaling video foundation models for multimodal video understanding. *arXiv preprint arXiv:2403.15377*, 2024. 2
- [55] Yubo Wang, Xueguang Ma, Ge Zhang, Yuansheng Ni, Abhrranil Chandra, Shiguang Guo, Weiming Ren, Aaran Arulraj, Xuan He, Ziyang Jiang, Tianle Li, Max Ku, Kai Wang, Alex Zhuang, Rongqi Fan, Xiang Yue, and Wenhua Chen. Mmlu-pro: A more robust and challenging multi-task language understanding benchmark, 2024. 4, 5
- [56] Chengming Xu, Yanwei Fu, Bing Zhang, Zitian Chen, Yungang Jiang, and Xiangyang Xue. Learning to score figure skating sport videos. *IEEE Transactions on Circuits and Systems for Video Technology*, 30(12):4578–4590, 2020. 2
- [57] Jinglin Xu, Yongming Rao, Xumin Yu, Guangyi Chen, Jie Zhou, and Jiwen Lu. Finediving: A fine-grained dataset for procedure-aware action quality assessment, 2022. 2
- [58] Jinglin Xu, Guohao Zhao, Sibao Yin, Wenhao Zhou, and Yuxin Peng. Finesports: A multi-person hierarchical sports video dataset for fine-grained action understanding. In *Proceedings of the IEEE/CVF Conference on Computer Vision and Pattern Recognition (CVPR)*, pages 21773–21782, 2024. 2, 4
- [59] J. Yamato, J. Ohya, and K. Ishii. Recognizing human action in time-sequential images using hidden markov model. In *Proceedings 1992 IEEE Computer Society Conference on Computer Vision and Pattern Recognition*, pages 379–385, 1992. 1
- [60] Xiang Yue, Yuansheng Ni, Kai Zhang, Tianyu Zheng, Ruoqi Liu, Ge Zhang, Samuel Stevens, Dongfu Jiang, Weiming Ren, Yuxuan Sun, Cong Wei, Botao Yu, Ruibin Yuan, Renliang Sun, Ming Yin, Boyuan Zheng, Zhenzhu Yang, Yibo Liu, Wenhao Huang, Huan Sun, Yu Su, and Wenhua Chen. Mmmu: A massive multi-discipline multimodal understanding and reasoning benchmark for expert agi, 2024. 4
- [61] Beichen Zhang, Pan Zhang, Xiaoyi Dong, Yuhang Zang, and Jiaqi Wang. Long-clip: Unlocking the long-text capability of clip. *arXiv preprint arXiv:2403.15378*, 2024. 5, 18
- [62] Yuanhan Zhang, Jinming Wu, Wei Li, Bo Li, Zejun Ma, Ziwei Liu, and Chunyuan Li. Video instruction tuning with synthetic data, 2024. 5, 14
- [63] Tony Z. Zhao, Eric Wallace, Shi Feng, Dan Klein, and Sameer Singh. Calibrate before use: Improving few-shot performance of language models, 2021. 19
- [64] Jinguo Zhu, Weiyun Wang, Zhe Chen, Zhaoyang Liu, Shenglong Ye, Lixin Gu, Hao Tian, Yuchen Duan, Weijie Su, Jie Shao, Zhangwei Gao, Erfei Cui, Xuehui Wang, Yue Cao, Yangzhou Liu, Xingguang Wei, Hongjie Zhang, Haomin Wang, Weiye Xu, Hao Li, Jiahao Wang, Nianchen Deng, Songze Li, Yanan He, Tan Jiang, Jiapeng Luo, Yi Wang, Conghui He, Botian Shi, Xingcheng Zhang, Wenqi Shao, Junjun He, Yingtong Xiong, Wenwen Qu, Peng Sun, Penglong Jiao, Han Lv, Lijun Wu, Kaipeng Zhang, Huipeng Deng, Jiaye Ge, Kai Chen, Limin Wang, Min Dou, Lewei Lu, Xizhou Zhu, Tong Lu, Dahua Lin, Yu Qiao, Jifeng Dai, and Wenhua Wang. Internvl3: Exploring advanced training and test-time recipes for open-source multimodal models, 2025. 5, 14
